# Supplementary material for: Comparative proteomic and transcriptomic approaches to address the active role of GA4 in Japanese apricot flower bud dormancy release
Source: PubMed Central journal article supplement (PMC3830480; doi:10.1093/jxb/ert284), 2013-09-07

# Comparative proteomic and transcriptomic approaches to address the active role of GA<sub>4</sub> in Japanese apricot flower buds dormancy release

*Weibing Zhuang, Zhihong Gao, Liangju Wang, Wenjun Zhong, Zhaojun Ni, Zhen Zhang*

## Supplementary material

**Supplementary Table S1 Specific primers used in relative quantitative real-time RT-PCR.**

| Gene name                                                | Accession  | Forward primer Sequence (5' to 3') | Reverse primer Sequence (5' to 3') |
|----------------------------------------------------------|------------|------------------------------------|------------------------------------|
| beta-galactosidase                                       | ppa020752  | ACGAAGACTTTTGCTATCCG               | AAATCATACTGGCGACGAAC               |
| histone superfamily protein                              | ppa013173  | GCTCCCATTTTCAGCGTTTG               | ATGATGGTGACCCTCTTGG                |
| beta-amylase 6                                           | ppa004334  | GCTCAGGTATCCCTCTTAT                | TCAGGAGCGTCATTGTATT                |
| tubulin beta 8                                           | ppa004884  | GTCAATCTGGTGCTGGAAAC               | ATACACTCGTCTGCGTTCT                |
| glutathione S-transferase TAU 10                         | ppa025728  | GCAAGCCAATCGCAGAATC                | CACCACAATACCCAGAAAGC               |
| aldehyde dehydrogenase 3I1                               | ppa005609  | AACGAGGCACTGAAAGAAT                | TCTTATCCCACTTCTGCTCT               |
| ATPase, F1 complex, OSCP/delta subunit protein           | ppa1027122 | AACTGGGTATGCCGCTGCTC               | CCAAATGCCTATTGAATCTCCCT            |
| chitinase A                                              | ppa026927  | TGGACGGCATAGATTTCAACAT             | TGTAGTCAGACAACCTCCT                |
| gibberellin-regulated family protein                     | ppa024899  | CTTGGCTCCTCTTTGATGG                | CTTGAACCTCTGCTACTGC                |
| actin-related protein 5                                  | ppa002045  | TATCTGTCCTGGATTTACC                | AACAGTGCTCCATCTTCAGGT              |
| dormancy-associated protein-like 1                       | ppa013510  | GATGACATTGTTGCTGGAC                | TTAGCGATGCTTGCTCCTGGTC             |
| late embryogenesis abundant protein (LEA) family protein | ppa011378  | CAGTATCAGTAGCCTCGTT                | CCCAATGTTCTGTTCCCTC                |

**Supplementary Table S2 The matched peptide sequences and corresponding m/z ratio of the 42 identified proteins in our study.**

| <sup>a</sup> Spot No | <sup>b</sup> NP | <sup>c</sup> Matched peptide sequences | corresponding m/z ratio |
|----------------------|-----------------|----------------------------------------|-------------------------|
| 1                    | 4               | K.ITFGEGSQYGYVK.H                      | 1448.7163               |
|                      |                 | K.KITFGEGSQYGYVK.H                     | 1576.8153               |
|                      |                 | K.HSEILEGDGGPGTIKK.I                   | 1637.8595               |
|                      |                 | M.GVFTYESEFTSEIPPR.L                   | 1955.9763               |
| 2                    | 3               | K.AIDERSEQIR.S                         | 1216.6252               |
|                      |                 | R.NVVIEQSFQAPK.V                       | 1288.6797               |
|                      |                 | R.GYISPYFITNQK.N                       | 1430.7239               |
| 3                    | 4               | K.SVAAGMNAMDLRR.G                      | 1391.6783               |
|                      |                 | R.GYISPYFITNPK.N                       | 1399.7144               |
|                      |                 | K.TLYNELEVVEGMKLDLDR.G                 | 1908.9644               |
|                      |                 | K.QVANATNDAAGDGTTCATVLTR.A             | 2207.0308               |
| 5                    | 2               | K.RPDLVQAR.I                           | 954.5444                |
|                      |                 | R.AINGAVECDGKRPDLVQAR.I                | 2069.0476               |
| 6                    | 5               | A.AKITFTNK.C                           | 922.5299                |
|                      |                 | K.GSDGSVIACK.S                         | 993.4805                |
|                      |                 | K.ASTCPADVNAVCPAELQVK.G                | 2087.0239               |
|                      |                 | K.IFKDQCPQAYSAYDDK.S                   | 2111.9314               |
|                      |                 | K.SACLALNQPQYCCTPPNDKPETCPPTEYSK.I     | 3560.5208               |
| 8                    | 8               | K.GQHPLFPR.I                           | 951.5095                |
|                      |                 | K.GTFYGNYPKPR.S                        | 1174.5764               |
|                      |                 | K.THPVNFLNER.T                         | 1226.6185               |
|                      |                 | K.AFDLMLSGQSIR.C                       | 1337.6759               |
|                      |                 | R.IIGVDLNSNRFEEAK.K                    | 1714.8999               |
|                      |                 | R.IIGVDLNSNRFEEAKK.F                   | 1842.991                |
|                      |                 | K.KGSSVAIFGLGAVGLAAAEGAR.V             | 2002.094                |
|                      |                 | R.AAVAWAAGKPLSIEEVEVAPPQKEEVR.L        | 2932.5415               |
| 9                    | 6               | K.TASGKPFVDVLK.E                       | 1261.7113               |
|                      |                 | K.ASPEVIAEYTVR.A                       | 1334.6919               |
|                      |                 | K.KASPEVIAEYTVR.A                      | 1476.7981               |
|                      |                 | K.GILAADESTGTIGKR.F                    | 1488.7963               |
|                      |                 | R.FASINVENVESNRR.A                     | 1634.8182               |
|                      |                 | K.IGPNESQLSINENANGLAR.Y                | 2094.0491               |
| 10                   | 2               | K.VKDGVPHLTK.V                         | 1093.6373               |
|                      |                 | R.GGVIDEDALVR.A                        | 1143.6039               |
| 11                   | 7               | R.AMLNLR.A                             | 959.5358                |
|                      |                 | K.YVPYVADSKR.A                         | 1197.6284               |
|                      |                 | K.VVVLWTANTER.Y                        | 1287.7068               |
|                      |                 | R.VGSFNGEEIYAPFK.S                     | 1557.7574               |
|                      |                 | MFIESFKVESPNVK.Y                       | 1654.8512               |

---

|    |   |                           |           |
|----|---|---------------------------|-----------|
|    |   | K.VQQANYFGSLTQASSIR.V     | 1869.9457 |
|    |   | K.DKVQQANYFGSLTQASSIR.V   | 2113.0713 |
| 12 | 3 | K.FFVGGNWK.C              | 954.4681  |
|    |   | K.VIACVGETLEQR.E          | 1374.6797 |
|    |   | K.DSLKPDFHVAAQNCWVK.K     | 2014.9623 |
| 13 | 5 | R.ALRLDLR.I               | 985.5793  |
|    |   | K.TFQGPPHGIQVER.D         | 1465.7632 |
|    |   | K.DFQGPPHGIQVER.D         | 1479.7694 |
|    |   | K.YGRPLLGCTIKPK.L         | 1502.8491 |
|    |   | R.LTYYTPDYETKDTDILAAFR.V  | 2396.1619 |
| 15 | 4 | R.QKNHGMHFR.V             | 1154.5646 |
|    |   | R.MSGGDHIHAGTV            | 1465.7179 |
|    |   | R.MSGGDHIHAGTVVGKLEGER.E  | 2050.0146 |
|    |   | R.EITLGFVDLLRDDFVEQDR.S   | 2280.2031 |
| 16 | 2 | R.LTGKHETADINTFK.W        | 1574.8241 |
|    |   | K.HKEHIAAYGEGNER.R        | 1610.7733 |
| 17 | 2 | K.EIAFDAIDKAPEEK.A        | 1575.798  |
|    |   | R.HYAHVDCPGHADYVK.N       | 1768.7843 |
| 18 | 7 | R.QVLTYSGER.K             | 965.5047  |
|    |   | R.KPVEHFLK.T              | 997.5815  |
|    |   | K.AAVLMNLESR.M            | 1103.5939 |
|    |   | R.EVEAIGGHIGASASR.E       | 1453.7429 |
|    |   | K.TYVPQMVELLVDAVR.N       | 1732.9276 |
|    |   | R.NPAFLEWEVNEELKK.V       | 1845.9386 |
|    |   | R.LNGSVLEDFVAENYAR.R      | 1897.9318 |
| 19 | 8 | R.VSYDLANNR.V             | 1051.5182 |
|    |   | R.LQTEAYNSLR.D            | 1194.6116 |
|    |   | R.VETFYYVGLK.G            | 1218.6416 |
|    |   | K.ATSFSYCLVNR.D           | 1317.6285 |
|    |   | R.VQVPTVSFLFADGK.S        | 1507.8143 |
|    |   | K.DSRVETFYYVGLK.G         | 1576.8075 |
|    |   | E.DLSTPVVSGVSQSGGEYFTR.I  | 2086.0222 |
|    |   | R.DLPSASGFALFDTCYDLSSR.S  | 2294.0381 |
| 20 | 5 | K.TVFASATER.D             | 981.4905  |
|    |   | K.HLIYQHQNK.Q             | 1317.6709 |
|    |   | K.GCVFTYDAVGSYER.V        | 1623.6991 |
|    |   | K.LADKAVLASSGFQADVK.A     | 1719.9153 |
|    |   | R.VGYSSQSGSTLIIPFLDNQLK.S | 2324.1978 |
| 21 | 4 | K.LGEIDQVTQR.R            | 1146.5801 |
|    |   | R.FLCGSVGALVENGKR.L       | 1606.8414 |
|    |   | R.LLALDGSVLPVVFER.A       | 1627.9449 |
|    |   | R.LLALDGSVLPVVFERA        | 1698.9852 |

---

---

|    |   |                                             |           |
|----|---|---------------------------------------------|-----------|
| 22 | 7 | K.SIHDFTVK.D                                | 946.5182  |
|    |   | K.GKDVDLSIYK.G                              | 1137.6353 |
|    |   | K.SIHDFTVKDAK.G                             | 1260.6759 |
|    |   | R.YAPTTTPLSIEK.D                            | 1306.7079 |
|    |   | K.FLVDKEGNVVDR.Y                            | 1390.7523 |
|    |   | R.YAPTTTPLSIEKDVKK.L                        | 1776.9961 |
|    |   | R.FKAEYPIFDKVDVNGDNAAPIYK.F                 | 2601.3875 |
| 23 | 6 | K.ALEQLHDAIAK.G                             | 1208.6426 |
|    |   | K.YASEVYEKESP                               | 1301.5703 |
|    |   | K.HHQTYVTNYNK.A                             | 1404.6464 |
|    |   | K.FNGGGHVNHSIFWK.N                          | 1599.7581 |
|    |   | K.KLVVETTANQDPLVTK.G                        | 1755.9645 |
|    |   | K.ALEQLHDAIAKGDAAAVVK.L                     | 1920.0295 |
| 24 | 6 | R.EDKPEPPPEGR.L                             | 1250.5913 |
|    |   | K.GNDHLRDVFGK.T                             | 1257.6204 |
|    |   | R.IAWHSAGTYDSR.T                            | 1335.618  |
|    |   | K.HAAEQSHGANAGLDIAVR.L                      | 1816.8868 |
|    |   | K.YAADEDAFFADYAAAQR.L                       | 2031.8658 |
|    |   | K.TMGLSDQDIVALSGGHTLGR.C                    | 2043.9987 |
| 25 | 6 | R.EDKPEPPPEGR.L                             | 1250.6213 |
|    |   | K.GNDHLRDVFGK.T                             | 1257.6552 |
|    |   | R.IAWHSAGTYDSR.T                            | 1335.6538 |
|    |   | K.HAAEQSHGANAGLDIAVR.L                      | 1816.9325 |
|    |   | K.YAADEDAFFADYAAAQR.L                       | 2031.9215 |
|    |   | K.TMGLSDQDIVALSGGHTLGR.C                    | 2044.0458 |
| 26 | 7 | K.ACAPMLR.I                                 | 947.4691  |
|    |   | K.GNDHLRDVFGK.T                             | 1257.6155 |
|    |   | R.IAWHSAGTYDSR.T                            | 1335.6106 |
|    |   | M.GKSYPTVSEEYK.K                            | 1515.7434 |
|    |   | K.HAAEQSHGANAGLDIAVR.L                      | 1816.8796 |
|    |   | K.YAADEDAFFADYAAAQR.L                       | 2031.8593 |
|    |   | K.TMGLSDQDIVALSGGHTLGR.C                    | 2043.9905 |
| 27 | 3 | R.VVSCSDITALAAR.D                           | 1362.6897 |
|    |   | K.VFKEDIGQAAGLLR.L                          | 1516.8337 |
|    |   | R.DSVFLSGPDYDVPLGR.K                        | 1793.8508 |
| 28 | 2 | K.NLTHGAPPEDEIR.H                           | 1351.6661 |
|    |   | R.HAGDLGNIVANADGVAEATIVDNQIPLTGPNV<br>IGR.A | 3552.9392 |
| 29 | 4 | K.VRDSLDTTK.L                               | 1034.5638 |
|    |   | K.KAQDEVLVISGIK.Y                           | 1399.828  |
|    |   | K.ATVSSADLTTNFPATLTDITVEVAR.T               | 2694.457  |
|    |   | R.KATVSSADLTTNFPATLTDITVEVAR.T              | 2822.5479 |
| 30 | 7 | K.ACAPMLR.I                                 | 945.5106  |

---

---

|    |   |                                    |           |
|----|---|------------------------------------|-----------|
|    |   | R.EDKPEPPPEGR.L                    | 1250.6094 |
|    |   | K.GNDHLRDVFGK.T                    | 1257.6443 |
|    |   | R.IAWHSAGTYDSR.T                   | 1335.6427 |
|    |   | K.HAAEQSHGANAGLDIAVR.L             | 1816.9215 |
|    |   | K.YAADEDAFFADYAAAHR.L              | 2031.9071 |
|    |   | K.TMGLSDQDIVALSGGHTLGR.C           | 2044.0356 |
| 31 | 8 | K.EIVDLCLDR.I                      | 1132.5597 |
|    |   | R.LVSQVISSLTASLR.F                 | 1473.8507 |
|    |   | R.SLDIERPTYTNLNR.L                 | 1691.8628 |
|    |   | R.AIFVDLEPTVIDEVR.T                | 1715.9087 |
|    |   | R.AIFVDLEPTVIDEVR.T                | 1729.9193 |
|    |   | K.TVGRGDDAFNTEFFSETGAGK.H          | 2076.9524 |
|    |   | R.QLFHPEQLISGKEDAANNFAR.G          | 2368.1829 |
|    |   | R.QLFHPEQLISGKEDAANNFAR.G          | 2385.1914 |
| 32 | 7 | R.AVFPISVGRPR.H                    | 1198.7482 |
|    |   | K.GEYDESGPSIVHR.K                  | 1445.6742 |
|    |   | K.NYELPDGQVITIGAER.F               | 1774.9039 |
|    |   | R.VAPEEHPVLLTEAPLNPK.A             | 1954.0725 |
|    |   | K.DLYGNIVLSGGSTMFPGIADR.M          | 2183.0947 |
|    |   | K.SSSSVEKNYELPDGQVITIGAER.F        | 2479.2507 |
|    |   | R.TTGIVLDSGDGVSHTVPIYEGYALPHAILR.L | 3151.699  |
| 33 | 2 | R.SIVFKIEEK.Q                      | 1092.6321 |
|    |   | R.IFFIAWSPDTSR.V                   | 1439.7449 |
| 35 | 6 | A.KVFFEER.F                        | 954.5153  |
|    |   | R.FEDGWDKR.W                       | 1052.4905 |
|    |   | R.WVTSEWKK.E                       | 1063.5643 |
|    |   | K.YVGIELWQVK.S                     | 1266.6836 |
|    |   | K.HEQKLDCCGGYIK.L                  | 1504.7363 |
|    |   | K.SGTLFDNILITDEPEYAK.Q             | 2026.0276 |
| 36 | 6 | K.YLPHSEQK.S                       | 1001.4897 |
|    |   | R.RQAQLKPETAPK.L                   | 1366.7649 |
|    |   | K.AIITHQLQSLKR.E                   | 1393.8146 |
|    |   | K.LQAALPGLPQELIK.E                 | 1490.8678 |
|    |   | K.EIGLTVVYVAQLLR.R                 | 1576.8484 |
|    |   | R.SYDPNLIQDPTIYR.L                 | 1694.8157 |
| 38 | 8 | K.STSHYHTK.G                       | 972.4933  |
|    |   | K.AFVLDADNLVPK.I                   | 1301.7198 |
|    |   | K.ITFGEGSQYGYVK.H                  | 1448.7163 |
|    |   | K.HSEILEGDGGPGTIK.K                | 1509.7646 |
|    |   | K.KITFGEGSQYGYVK.H                 | 1576.8123 |
|    |   | K.HSEILEGDGGPGTIKK.I               | 1637.8595 |
|    |   | M.GVFTYESEFTSEIPPR.L               | 1955.9546 |

---

---

|    |   |                                              |           |
|----|---|----------------------------------------------|-----------|
|    |   | M.GVFTYESEFTSEIPPPR.L                        | 1969.9675 |
| 39 | 6 | R.TIERPEYK.Y                                 | 1035.5544 |
|    |   | R.QPGPIPGLNTK.I                              | 1121.6323 |
|    |   | K.GGNVTREPGPVK.G                             | 1210.6584 |
|    |   | K.ITSFLDPDGWK.T                              | 1278.6406 |
|    |   | K.ITRQPGPIPGLNTK.I                           | 1491.8674 |
|    |   | K.SAEVVNLVTQELGGK.I                          | 1543.8413 |
| 40 | 7 | K.ITITNDKGR.L                                | 1017.5773 |
|    |   | K.NALENYAYNMR.N                              | 1358.6285 |
|    |   | K.NALENYAYNMR.N                              | 1374.6219 |
|    |   | K.STVHDVVLVGGSTR.I                           | 1426.782  |
|    |   | K.MDKSTVHDVVLVGGSTR.I                        | 1800.9454 |
|    |   | K.VQQLLQDFNKGELCK.S                          | 1967.0206 |
|    |   | K.EQVFSTYSNQPGLIQQVYEGER.T                   | 2658.3003 |
| 41 | 5 | K.HLNITLTR.S                                 | 967.5748  |
|    |   | R.EAELHAQKDQER.K                             | 1453.7051 |
|    |   | R.SKFEVLNHLIER.T                             | 1571.8561 |
|    |   | R.QAVTNPTNTVFGTR.L                           | 1633.8667 |
|    |   | K.GVNPDEAVAMGAAIQGGILR.G                     | 1939.0106 |
| 42 | 5 | R.ALRLDLR.I                                  | 985.5885  |
|    |   | K.DTDILAAFR.M                                | 1021.5345 |
|    |   | K.TFQPPHGIQVER.D                             | 1465.7737 |
|    |   | K.LTYYPDYETKDTDILAAFR.M                      | 2396.1758 |
|    |   | R.MTPQGVPPPEAGAAVAESSTGTWTTVWTDG<br>LTSLDR.Y | 3854.9519 |
| 43 | 8 | K.IGLFGGAGVGK.T                              | 975.5593  |
|    |   | K.THDFLPIHR.E                                | 1135.6067 |
|    |   | K.VVDLLAPYQR.G                               | 1173.6659 |
|    |   | K.AHGGFSVFAGVGER.T                           | 1390.6832 |
|    |   | R.VGLTGLTVAEHFR.D                            | 1399.7695 |
|    |   | K.VLNTGSPITVPVGR.A                           | 1409.8174 |
|    |   | R.FTQANSEVSALLGR.I                           | 1492.7762 |
|    |   | R.IPSAVGYQPTLATDLGGLQER.I                    | 2186.1545 |
| 44 | 6 | K.DPGQNPFSFQIGK.G                            | 1448.7648 |
|    |   | K.GWDEGLVLMQVGEVAR.L                         | 1773.8798 |
|    |   | K.GWDEGLVLMQVGEVAR.L                         | 1789.875  |
|    |   | K.GAVIKWDEGLVLMQVGEVAR.L                     | 2242.1946 |
|    |   | K.GAVIKWDEGLVLMQVGEVAR.L                     | 2258.1819 |
|    |   | R.EVVSAGTGPKPTVGQKVTVHCTGYGK.N               | 2657.3752 |
| 45 | 5 | K.AGINVIQIDEAALR.E                           | 1482.845  |
|    |   | K.YGAGIGPGVYDIHSPR.I                         | 1658.8521 |
|    |   | K.SEQAFYLDWAVHSFR.I                          | 1855.8909 |
|    |   | R.KSEQAFYLDWAVHSFR.I                         | 1983.9888 |

---

|    |   |                              |           |
|----|---|------------------------------|-----------|
|    |   | R.EGVKYGAGIGPGVYDIHSPR.I     | 2072.0857 |
| 46 | 8 | K.AFFDSTGGLWR.T              | 1256.6001 |
|    |   | K.GGSPYGAGTYAGDGTR.Q         | 1486.644  |
|    |   | R.QPSELELQQAFHQGK.Y          | 1722.8302 |
|    |   | R.QPSELELQQAFHQGK.Y          | 1739.8549 |
|    |   | K.VYIVYYSMYGHVEK.L           | 1750.8378 |
|    |   | K.VYIVYYSMYGHVEK.L           | 1766.8293 |
|    |   | K.SEVPIISPNDLSEADGLLFGFPTR.F | 2574.2896 |
|    |   | K.SEVPIISPNDLSEADGLLFGFPTR.F | 2588.301  |
| 47 | 5 | M.ASAEIEFR.C                 | 964.4606  |
|    |   | K.IINDRETGR.S                | 1073.5573 |
|    |   | R.GFGFVTFSNEK.A              | 1232.5844 |
|    |   | R.AFSPFGEIIESK.I             | 1324.6638 |
|    |   | R.CFVGGLAWATDNDALER.A        | 1894.8655 |

<sup>a</sup> Numbering corresponds to the 2-DE gel in Fig. 2.

<sup>b</sup> The total number of peptides identified.

<sup>c</sup> The sequences of matched peptides identified.

**Supplementary Table S3 Three replicates data sets of protein spot expression value in control, G10 and W10 in our study.**

| <sup>a</sup> Spot No | control (1) | control (2) | control (3) | control (average) | G10 (1) | G10 (2) | G10 (3) | G10 (average) | W10 (1) | W10 (2) | W10 (3) | W10 (average) |
|----------------------|-------------|-------------|-------------|-------------------|---------|---------|---------|---------------|---------|---------|---------|---------------|
| 1                    | 8.31        | 8.31        | 8.31        | 8.31              | 2.44    | 2.46    | 2.45    | 2.45          | 3.30    | 3.28    | 3.29    | 3.29          |
| 2                    | 0.65        | 0.65        | 0.65        | 0.65              | 1.89    | 1.90    | 1.91    | 1.90          | 1.11    | 1.11    | 1.11    | 1.11          |
| 3                    | 1.35        | 1.35        | 1.35        | 1.35              | 3.47    | 3.49    | 3.54    | 3.50          | 1.43    | 1.46    | 1.40    | 1.43          |
| 4                    | 0.31        | 0.32        | 0.27        | 0.30              | 2.80    | 2.80    | 2.80    | 2.80          | 0.36    | 0.36    | 0.36    | 0.36          |
| 5                    | 0.32        | 0.30        | 0.28        | 0.30              | 5.80    | 6.30    | 6.20    | 6.10          | 0.27    | 0.26    | 0.31    | 0.28          |
| 6                    | 1.80        | 1.80        | 1.80        | 1.80              | 12.60   | 12.60   | 12.60   | 12.60         | 2.23    | 2.23    | 2.23    | 2.23          |
| 7                    | 7.95        | 7.93        | 7.97        | 7.95              | 1.90    | 1.90    | 1.90    | 1.90          | 5.67    | 5.67    | 5.67    | 5.67          |
| 8                    | 5.48        | 5.43        | 5.44        | 5.45              | 14.99   | 14.99   | 14.99   | 14.99         | 14.30   | 14.31   | 14.23   | 14.28         |
| 9                    | 2.64        | 2.66        | 2.65        | 2.65              | 8.05    | 8.05    | 8.05    | 8.05          | 5.00    | 5.00    | 5.00    | 5.00          |
| 10                   | 2.85        | 2.84        | 2.86        | 2.85              | 7.18    | 7.18    | 7.18    | 7.18          | 3.43    | 3.43    | 3.43    | 3.43          |
| 11                   | 1.96        | 1.96        | 1.96        | 1.96              | 0.73    | 0.78    | 0.80    | 0.77          | 1.83    | 1.83    | 1.83    | 1.83          |
| 12                   | 4.13        | 4.13        | 4.13        | 4.13              | 10.49   | 10.49   | 10.49   | 10.49         | 5.01    | 5.12    | 5.08    | 5.07          |
| 13                   | 1.90        | 1.63        | 1.72        | 1.75              | 8.88    | 9.00    | 8.77    | 8.85          | 2.03    | 1.90    | 1.86    | 1.93          |
| 14                   | 0.00        | 0.00        | 0.00        | 0.00              | 2.85    | 2.85    | 2.85    | 2.85          | 0.00    | 0.00    | 0.00    | 0.00          |
| 15                   | 0.00        | 0.00        | 0.00        | 0.00              | 6.65    | 6.65    | 6.65    | 6.65          | 0.00    | 0.00    | 0.00    | 0.00          |
| 16                   | 2.20        | 2.20        | 2.20        | 2.20              | 5.36    | 5.34    | 5.35    | 5.35          | 2.03    | 2.03    | 2.03    | 2.03          |
| 17                   | 0.85        | 0.85        | 0.85        | 0.85              | 2.30    | 2.23    | 2.22    | 2.25          | 0.96    | 0.96    | 0.96    | 0.96          |
| 18                   | 0.76        | 0.76        | 0.76        | 0.76              | 2.04    | 2.04    | 2.04    | 2.04          | 0.83    | 0.83    | 0.83    | 0.83          |
| 19                   | 1.23        | 1.22        | 1.24        | 1.23              | 3.51    | 3.51    | 3.51    | 3.51          | 1.50    | 1.51    | 1.52    | 1.51          |
| 20                   | 0.75        | 0.75        | 0.75        | 0.75              | 2.55    | 2.55    | 2.55    | 2.55          | 0.82    | 0.82    | 0.82    | 0.82          |



|    |       |       |       |       |       |       |       |       |       |       |       |       |
|----|-------|-------|-------|-------|-------|-------|-------|-------|-------|-------|-------|-------|
| 21 | 0.00  | 0.00  | 0.00  | 0.00  | 5.85  | 5.85  | 5.85  | 5.85  | 0.00  | 0.00  | 0.00  | 0.00  |
| 22 | 2.55  | 2.55  | 2.55  | 2.55  | 5.80  | 5.80  | 5.80  | 5.80  | 2.60  | 2.61  | 2.62  | 2.61  |
| 23 | 5.80  | 5.80  | 5.80  | 5.80  | 15.07 | 15.09 | 15.08 | 15.08 | 14.61 | 14.62 | 14.63 | 14.62 |
| 24 | 4.25  | 4.25  | 4.25  | 4.25  | 1.95  | 1.95  | 1.95  | 1.95  | 4.32  | 4.34  | 4.33  | 4.33  |
| 25 | 8.39  | 8.13  | 8.08  | 8.20  | 1.13  | 1.17  | 1.15  | 1.15  | 8.39  | 8.31  | 8.32  | 8.34  |
| 26 | 1.25  | 1.25  | 1.25  | 1.25  | 7.55  | 7.55  | 7.55  | 7.55  | 2.03  | 2.03  | 2.03  | 2.03  |
| 27 | 0.30  | 0.30  | 0.30  | 0.30  | 2.31  | 2.29  | 2.30  | 2.30  | 0.35  | 0.35  | 0.35  | 0.35  |
| 28 | 1.55  | 1.55  | 1.55  | 1.55  | 4.20  | 4.25  | 4.15  | 4.20  | 3.33  | 3.33  | 3.33  | 3.33  |
| 29 | 0.73  | 0.83  | 0.69  | 0.75  | 2.27  | 1.96  | 1.92  | 2.05  | 0.80  | 0.74  | 0.74  | 0.76  |
| 30 | 9.85  | 9.85  | 9.85  | 9.85  | 1.05  | 1.04  | 1.06  | 1.05  | 2.26  | 2.22  | 2.27  | 2.25  |
| 31 | 0.10  | 0.12  | 0.14  | 0.12  | 0.42  | 0.43  | 0.44  | 0.43  | 0.11  | 0.11  | 0.11  | 0.11  |
| 32 | 8.45  | 8.45  | 8.45  | 8.45  | 30.67 | 30.68 | 30.66 | 30.67 | 8.44  | 8.44  | 8.44  | 8.44  |
| 33 | 0.96  | 0.94  | 0.95  | 0.95  | 2.40  | 2.40  | 2.40  | 2.40  | 0.86  | 0.87  | 0.88  | 0.87  |
| 34 | 0.75  | 0.75  | 0.75  | 0.75  | 3.44  | 3.45  | 3.46  | 3.45  | 0.73  | 0.73  | 0.73  | 0.73  |
| 35 | 27.80 | 28.10 | 27.50 | 27.80 | 10.45 | 10.45 | 10.45 | 10.45 | 25.30 | 25.30 | 25.30 | 25.30 |
| 36 | 1.31  | 1.23  | 1.21  | 1.25  | 3.35  | 3.35  | 3.35  | 3.35  | 3.12  | 3.12  | 3.12  | 3.12  |
| 37 | 0.00  | 0.00  | 0.00  | 0.00  | 16.20 | 16.20 | 16.20 | 16.20 | 0.00  | 0.00  | 0.00  | 0.00  |
| 38 | 1.75  | 1.75  | 1.75  | 1.75  | 1.84  | 1.85  | 1.83  | 1.84  | 4.81  | 4.81  | 4.81  | 4.81  |
| 39 | 4.65  | 4.65  | 4.65  | 4.65  | 4.73  | 4.73  | 4.73  | 4.73  | 1.44  | 1.43  | 1.42  | 1.43  |
| 40 | 0.31  | 0.31  | 0.31  | 0.31  | 0.46  | 0.40  | 0.40  | 0.42  | 0.94  | 0.91  | 0.91  | 0.92  |
| 41 | 1.64  | 1.62  | 1.63  | 1.63  | 1.57  | 1.60  | 1.60  | 1.59  | 4.74  | 4.74  | 4.80  | 4.76  |
| 42 | 8.34  | 8.34  | 8.34  | 8.34  | 8.51  | 8.60  | 8.60  | 8.57  | 21.14 | 21.20 | 21.20 | 21.18 |
| 43 | 0.91  | 0.97  | 0.97  | 0.95  | 0.83  | 0.83  | 0.83  | 0.83  | 2.40  | 2.39  | 2.41  | 2.40  |

---

|    |      |      |      |      |      |      |      |      |      |      |      |      |
|----|------|------|------|------|------|------|------|------|------|------|------|------|
| 44 | 1.15 | 1.15 | 1.15 | 1.15 | 1.23 | 1.23 | 1.23 | 1.23 | 3.34 | 3.35 | 3.36 | 3.35 |
| 45 | 0.80 | 0.80 | 0.80 | 0.80 | 0.74 | 0.74 | 0.74 | 0.74 | 2.26 | 2.26 | 2.26 | 2.26 |
| 46 | 0.71 | 0.73 | 0.75 | 0.73 | 0.75 | 0.84 | 0.84 | 0.81 | 1.85 | 1.85 | 1.85 | 1.85 |
| 47 | 1.21 | 1.21 | 1.21 | 1.21 | 1.33 | 1.33 | 1.33 | 1.33 | 2.95 | 2.95 | 2.95 | 2.95 |
| 48 | 2.45 | 2.45 | 2.45 | 2.45 | 2.37 | 2.37 | 2.37 | 2.37 | 0.96 | 0.96 | 0.99 | 0.97 |

---

<sup>a</sup> Numbering corresponds to the 2-DE gel in Fig. 2.

**Supplementary Table S4 Summary statistics of DGE tags in Japanese apricot after GA<sub>4</sub> treatment in control and A libraries.**

| <b>Summary</b>                  |                             | <b>Control</b> | <b>A</b> |
|---------------------------------|-----------------------------|----------------|----------|
| Raw Data                        | Total                       | 3620084        | 3451950  |
|                                 | Distinct Tag                | 390999         | 375393   |
| Clean Tag                       | Total number                | 3391578        | 3244431  |
|                                 | Distinct Tag number         | 163411         | 168839   |
| All Tag Mapping to Gene         | Total number                | 693822         | 732349   |
|                                 | Total % of clean tag        | 20.46%         | 22.57%   |
|                                 | Distinct Tag number         | 28165          | 30199    |
|                                 | Distinct Tag % of clean tag | 17.24%         | 17.89%   |
| Unambiguous Tag Mapping to Gene | Total number                | 688544         | 725107   |
|                                 | Total % of clean tag        | 20.30%         | 22.35%   |
|                                 | Distinct Tag number         | 27896          | 29900    |
|                                 | Distinct Tag % of clean tag | 17.07%         | 17.71%   |
| All Tag-mapped Genes            | number                      | 12757          | 13340    |
|                                 | % of ref genes              | 44.45%         | 46.48%   |
| Unambiguous Tag-mapped Genes    | number                      | 12578          | 13137    |
|                                 | % of ref genes              | 43.82%         | 45.77%   |
| Mapping to Genome               | Total number                | 1812504        | 1603808  |
|                                 | Total % of clean tag        | 53.44%         | 49.43%   |
|                                 | Distinct Tag number         | 69110          | 73506    |
|                                 | Distinct Tag % of clean tag | 42.29%         | 43.54%   |
| Unknown Tag                     | Total number                | 885252         | 908274   |
|                                 | Total % of clean tag        | 26.10%         | 27.99%   |
|                                 | Distinct Tag number         | 66136          | 65134    |
|                                 | Distinct Tag % of clean tag | 40.47%         | 38.58%   |

**Supplementary Table S5 The up-regulated and down-regulated genes in Japanese apricot after GA<sub>4</sub> treatment (10 days).**

| Gene                      | log <sub>2</sub> Ratio(A/Control) | P-Value  | FDR      |
|---------------------------|-----------------------------------|----------|----------|
| ppa020752m PACid:17666384 | 12.882452                         | 7.11E-77 | 1.00E-74 |
| ppa005526m PACid:17648635 | 12.87670878                       | 1.45E-76 | 1.98E-74 |
| ppa010862m PACid:17653615 | 12.55314928                       | 2.46E-61 | 2.47E-59 |
| ppa006857m PACid:17658300 | 12.48507456                       | 1.54E-58 | 1.47E-56 |
| ppa007395m PACid:17655705 | 12.19383333                       | 5.67E-48 | 4.23E-46 |
| ppa016543m PACid:17650738 | 12.01192607                       | 2.22E-42 | 1.47E-40 |
| ppa005563m PACid:17664224 | 11.82853321                       | 2.09E-37 | 1.24E-35 |
| ppa017189m PACid:17653044 | 11.60408986                       | 4.01E-32 | 2.01E-30 |
| ppa020405m PACid:17657243 | 11.01192607                       | 1.47E-21 | 5.29E-20 |
| ppa004774m PACid:17641694 | 10.92332749                       | 2.58E-20 | 8.64E-19 |
| ppa010650m PACid:17665966 | 10.75321675                       | 3.87E-18 | 1.18E-16 |
| ppa003587m PACid:17656052 | 10.70043972                       | 1.62E-17 | 4.72E-16 |
| ppa025313m PACid:17657410 | 10.70043972                       | 1.62E-17 | 4.71E-16 |
| ppa010476m PACid:17651721 | 10.50084188                       | 2.42E-15 | 6.30E-14 |
| ppa019741m PACid:17655782 | 10.50084188                       | 2.42E-15 | 6.28E-14 |
| ppa009870m PACid:17645209 | 10.46964182                       | 4.95E-15 | 1.26E-13 |
| ppa021935m PACid:17666610 | 10.46964182                       | 4.95E-15 | 1.26E-13 |
| ppa017962m PACid:17665879 | 10.43775207                       | 1.01E-14 | 2.51E-13 |
| ppa010314m PACid:17641658 | 10.43775207                       | 1.01E-14 | 2.51E-13 |
| ppa012971m PACid:17658092 | 10.40514146                       | 2.07E-14 | 5.08E-13 |
| ppa010893m PACid:17642568 | 10.15481811                       | 3.10E-12 | 6.49E-11 |
| ppa001782m PACid:17646120 | 9.990103964                       | 5.43E-11 | 1.04E-09 |
| ppa005532m PACid:17658974 | 9.700439718                       | 3.98E-09 | 6.47E-08 |
| ppa021285m PACid:17656504 | 9.59058705                        | 1.66E-08 | 2.52E-07 |
| ppa007744m PACid:17644219 | 9.531381461                       | 3.40E-08 | 4.99E-07 |
| ppa004903m PACid:17666247 | 9.469641817                       | 6.96E-08 | 9.80E-07 |
| ppa000618m PACid:17643020 | 9.469641817                       | 6.96E-08 | 9.79E-07 |
| ppa027202m PACid:17655696 | 9.469641817                       | 6.96E-08 | 9.78E-07 |
| ppa023842m PACid:17665296 | 9.405141463                       | 1.42E-07 | 1.93E-06 |
| ppa008418m PACid:17642361 | 9.337621902                       | 2.91E-07 | 3.80E-06 |
| ppa002104m PACid:17652890 | 9.337621902                       | 2.91E-07 | 3.79E-06 |
| ppa012381m PACid:17651185 | 9.337621902                       | 2.91E-07 | 3.79E-06 |
| ppa018651m PACid:17668648 | 9.266786541                       | 5.96E-07 | 7.45E-06 |
| ppa008559m PACid:17650323 | 9.266786541                       | 5.96E-07 | 7.44E-06 |
| ppa010698m PACid:17641243 | 9.194756854                       | 1.22E-06 | 1.45E-05 |
| ppa008126m PACid:17648010 | 9.194756854                       | 1.22E-06 | 1.45E-05 |
| ppa024800m PACid:17653974 | 9.194756854                       | 1.22E-06 | 1.44E-05 |
| ppa003158m PACid:17660551 | 9.194756854                       | 1.22E-06 | 1.44E-05 |
| ppa014802m PACid:17663559 | 9.194756854                       | 1.22E-06 | 1.44E-05 |
| ppb011302m PACid:17662919 | 9.116343961                       | 2.49E-06 | 2.80E-05 |

---

|                            |             |           |             |
|----------------------------|-------------|-----------|-------------|
| ppa023999m PACid:17650179  | 9.116343961 | 2.49E-06  | 2.80E-05    |
| ppa012371m PACid:17656309  | 9.116343961 | 2.49E-06  | 2.79E-05    |
| ppa020043m PACid:17657409  | 9.116343961 | 2.49E-06  | 2.79E-05    |
| ppa004709m PACid:17649321  | 9.116343961 | 2.49E-06  | 2.79E-05    |
| ppa022961m PACid:17645522  | 9.116343961 | 2.49E-06  | 2.79E-05    |
| ppa013681m PACid:17661666  | 9.116343961 | 2.49E-06  | 2.78E-05    |
| ppa012101m PACid:17659111  | 9.116343961 | 2.49E-06  | 2.78E-05    |
| ppa003848m PACid:17655130  | 9.116343961 | 2.49E-06  | 2.78E-05    |
| ppa019010m PACid:17665726  | 9.033423002 | 5.10E-06  | 5.42E-05    |
| ppa011478m PACid:17653594  | 9.033423002 | 5.10E-06  | 5.41E-05    |
| ppa006872m PACid:17651641  | 9.033423002 | 5.10E-06  | 5.41E-05    |
| ppa025978m PACid:17641290  | 8.945443836 | 1.04E-05  | 0.000106488 |
| ppa022427m PACid:17644356  | 8.945443836 | 1.04E-05  | 0.000106398 |
| ppa014756m PACid:17669137  | 8.945443836 | 1.04E-05  | 0.000106308 |
| ppa014614m PACid:17656152  | 8.945443836 | 1.04E-05  | 0.000106219 |
| ppa004215m PACid:17648712  | 8.945443836 | 1.04E-05  | 0.000106129 |
| ppa024779m PACid:17663048  | 8.945443836 | 1.04E-05  | 0.00010604  |
| ppa0211128m PACid:17656482 | 8.945443836 | 1.04E-05  | 0.000105951 |
| ppa003347m PACid:17652060  | 8.945443836 | 1.04E-05  | 0.000105862 |
| ppa017444m PACid:17645393  | 8.945443836 | 1.04E-05  | 0.000105773 |
| ppa013715m PACid:17640823  | 8.851749041 | 2.13E-05  | 0.000204333 |
| ppa019145m PACid:17652879  | 8.851749041 | 2.13E-05  | 0.000204171 |
| ppa018846m PACid:17656837  | 8.851749041 | 2.13E-05  | 0.000204009 |
| ppa001744m PACid:17668761  | 8.851749041 | 2.13E-05  | 0.000203848 |
| ppa023786m PACid:17668232  | 8.754887502 | 4.36E-05  | 0.00039536  |
| ppa005184m PACid:17661748  | 8.754887502 | 4.36E-05  | 0.000395064 |
| ppa009277m PACid:17657637  | 8.754887502 | 4.36E-05  | 0.000394768 |
| ppa005073m PACid:17668031  | 8.754887502 | 4.36E-05  | 0.000394472 |
| ppa010654m PACid:17664478  | 8.754887502 | 4.36E-05  | 0.000394177 |
| ppa014799m PACid:17658988  | 8.754887502 | 4.36E-05  | 0.000393883 |
| ppa005777m PACid:17644497  | 8.754887502 | 4.36E-05  | 0.000393588 |
| ppa013286m PACid:17642761  | 8.754887502 | 4.36E-05  | 0.000393295 |
| ppa000853m PACid:17659309  | 8.754887502 | 4.36E-05  | 0.000393001 |
| ppa009535m PACid:17663221  | 8.754887502 | 4.36E-05  | 0.000392709 |
| ppa003422m PACid:17667449  | 8.754887502 | 4.36E-05  | 0.000392416 |
| ppa006913m PACid:17667951  | 8.647458426 | 8.92E-05  | 0.000749083 |
| ppa026190m PACid:17655231  | 8.647458426 | 8.92E-05  | 0.000748563 |
| ppa008970m PACid:17653599  | 8.647458426 | 8.92E-05  | 0.000748044 |
| ppa004021m PACid:17644590  | 8.647458426 | 8.92E-05  | 0.000747525 |
| ppa007343m PACid:17644328  | 8.647458426 | 8.92E-05  | 0.000747007 |
| ppa020339m PACid:17667191  | 8.647458426 | 8.92E-05  | 0.000746489 |
| ppa004413m PACid:17661503  | 7.508264803 | 1.67E-208 | 9.17E-206   |
| ppa022764m PACid:17661764  | 6.958134874 | 8.11E-71  | 1.02E-68    |
| ppb006257m PACid:17668501  | 6.411583044 | 2.24E-117 | 6.16E-115   |

---

---

|                           |             |           |           |
|---------------------------|-------------|-----------|-----------|
| ppa008482m PACid:17662536 | 6.192501795 | 1.76E-80  | 2.76E-78  |
| ppa010081m PACid:17661637 | 5.707008097 | 1.15E-28  | 5.30E-27  |
| ppa011448m PACid:17646081 | 5.292282633 | 3.87E-21  | 1.34E-19  |
| ppa010953m PACid:17662037 | 5.284005612 | 3.20E-90  | 5.95E-88  |
| ppa015631m PACid:17664295 | 5.272807682 | 1.52E-40  | 9.70E-39  |
| ppa005598m PACid:17642571 | 5.171735159 | 1.04E-55  | 9.42E-54  |
| ppa007036m PACid:17651282 | 5.085303656 | 3.78E-18  | 1.16E-16  |
| ppa007458m PACid:17644502 | 5.063532191 | 7.50E-18  | 2.26E-16  |
| ppa004132m PACid:17652721 | 5.063532191 | 7.50E-18  | 2.26E-16  |
| ppa008310m PACid:17657706 | 5.059188087 | 1.30E-42  | 8.66E-41  |
| ppa010163m PACid:17654179 | 5.036716898 | 4.83E-99  | 1.08E-96  |
| ppa003578m PACid:17653567 | 5.029123421 | 1.11E-33  | 5.88E-32  |
| ppa011385m PACid:17661231 | 4.926063985 | 1.87E-38  | 1.13E-36  |
| ppa026306m PACid:17655756 | 4.831602468 | 6.16E-29  | 2.87E-27  |
| ppa020922m PACid:17661603 | 4.763915661 | 2.72E-14  | 6.61E-13  |
| ppa004722m PACid:17660068 | 4.734093742 | 2.68E-20  | 8.95E-19  |
| ppa014596m PACid:17662779 | 4.734093742 | 2.68E-20  | 8.92E-19  |
| ppa001718m PACid:17657879 | 4.712133076 | 0         | 0         |
| ppa003286m PACid:17661399 | 4.677663845 | 1.24E-92  | 2.38E-90  |
| ppa020423m PACid:17663376 | 4.540530044 | 1.91E-28  | 8.76E-27  |
| ppa003487m PACid:17649448 | 4.508585531 | 3.78E-181 | 1.90E-178 |
| ppa026396m PACid:17654737 | 4.456093333 | 2.34E-11  | 4.62E-10  |
| ppa021733m PACid:17642045 | 4.440680444 | 3.37E-16  | 9.14E-15  |
| ppb021546m PACid:17650603 | 4.421137699 | 4.58E-11  | 8.82E-10  |
| ppa003507m PACid:17663874 | 4.310882311 | 3.41E-10  | 6.13E-09  |
| ppa026775m PACid:17660787 | 4.254965882 | 1.03E-99  | 2.34E-97  |
| ppa005158m PACid:17665900 | 4.24309328  | 3.37E-69  | 4.11E-67  |
| ppa007271m PACid:17642246 | 4.2410081   | 7.01E-14  | 1.66E-12  |
| ppa017430m PACid:17643481 | 4.189421177 | 1.72E-21  | 6.13E-20  |
| ppa005715m PACid:17641909 | 4.178503091 | 2.00E-25  | 8.21E-24  |
| ppa020764m PACid:17653414 | 4.140071524 | 2.02E-32  | 1.02E-30  |
| ppa006610m PACid:17661856 | 4.124296707 | 6.42E-97  | 1.31E-94  |
| ppa007765m PACid:17660217 | 4.086307761 | 8.99E-20  | 2.94E-18  |
| ppa006606m PACid:17665894 | 3.960492862 | 1.01E-67  | 1.17E-65  |
| ppa020321m PACid:17655609 | 3.937535913 | 7.26E-21  | 2.47E-19  |
| ppa019974m PACid:17646594 | 3.936856017 | 4.52E-37  | 2.67E-35  |
| ppa012595m PACid:17667617 | 3.929576646 | 2.26E-30  | 1.10E-28  |
| ppa009806m PACid:17647648 | 3.929552404 | 4.40E-69  | 5.32E-67  |
| ppa015286m PACid:17666944 | 3.921487972 | 1.31E-07  | 1.78E-06  |
| ppa005640m PACid:17652286 | 3.817796669 | 4.83E-07  | 6.11E-06  |
| ppb013860m PACid:17665083 | 3.790431619 | 1.58E-15  | 4.16E-14  |
| ppa005141m PACid:17666232 | 3.763015383 | 9.23E-07  | 1.12E-05  |
| ppa017188m PACid:17661861 | 3.763015383 | 9.23E-07  | 1.12E-05  |
| ppa004380m PACid:17641292 | 3.731115165 | 1.80E-36  | 1.02E-34  |

---

---

|                           |             |           |             |
|---------------------------|-------------|-----------|-------------|
| ppa007566m PACid:17644782 | 3.729049927 | 1.33E-25  | 5.57E-24    |
| ppa018615m PACid:17644562 | 3.72591981  | 1.71E-17  | 4.96E-16    |
| ppa009630m PACid:17646182 | 3.707944001 | 1.76E-06  | 2.04E-05    |
| ppa004219m PACid:17642166 | 3.707008097 | 1.57E-22  | 5.80E-21    |
| ppb011173m PACid:17660206 | 3.69538649  | 4.76E-09  | 7.62E-08    |
| ppa002490m PACid:17667233 | 3.690353839 | 9.09E-25  | 3.64E-23    |
| ppa001896m PACid:17667538 | 3.663015836 | 0         | 0           |
| ppa012395m PACid:17649289 | 3.634807633 | 6.14E-46  | 4.42E-44    |
| ppa000296m PACid:17654244 | 3.616047531 | 1.71E-08  | 2.59E-07    |
| ppa006442m PACid:17664765 | 3.586998768 | 6.38E-06  | 6.69E-05    |
| ppa003797m PACid:17667031 | 3.586998768 | 6.38E-06  | 6.68E-05    |
| ppa002608m PACid:17643239 | 3.576446982 | 1.55E-29  | 7.35E-28    |
| ppa005142m PACid:17662404 | 3.573991383 | 3.24E-08  | 4.78E-07    |
| ppa027154m PACid:17667144 | 3.568715269 | 1.59E-66  | 1.79E-64    |
| ppa003134m PACid:17659748 | 3.547295445 | 2.26E-176 | 1.09E-173   |
| ppa001113m PACid:17664470 | 3.527003211 | 3.69E-95  | 7.43E-93    |
| ppa006923m PACid:17650909 | 3.524723079 | 6.25E-26  | 2.64E-24    |
| ppa002136m PACid:17668058 | 3.522498414 | 1.21E-05  | 0.000121455 |
| ppa001356m PACid:17664449 | 3.522498414 | 1.21E-05  | 0.000121354 |
| ppa012742m PACid:17648498 | 3.511419695 | 0         | 0           |
| ppa001287m PACid:17668109 | 3.507816151 | 5.24E-111 | 1.38E-108   |
| ppa018445m PACid:17649288 | 3.506625008 | 7.52E-52  | 6.27E-50    |
| ppa012380m PACid:17645332 | 3.489133595 | 6.14E-10  | 1.07E-08    |
| ppa012123m PACid:17664106 | 3.474519923 | 6.31E-12  | 1.29E-10    |
| ppa006304m PACid:17654545 | 3.454978853 | 2.28E-05  | 0.000216033 |
| ppa006153m PACid:17656361 | 3.454978853 | 2.28E-05  | 0.000215864 |
| ppa010683m PACid:17648689 | 3.454978853 | 2.28E-05  | 0.000215695 |
| ppa013577m PACid:17641362 | 3.454978853 | 2.28E-05  | 0.000215527 |
| ppa001085m PACid:17647032 | 3.4381575   | 7.48E-18  | 2.26E-16    |
| ppa014211m PACid:17664550 | 3.413814358 | 1.22E-41  | 7.86E-40    |
| ppa014104m PACid:17669275 | 3.385314035 | 4.87E-17  | 1.39E-15    |
| ppa023646m PACid:17651232 | 3.385314035 | 4.05E-09  | 6.56E-08    |
| ppa009128m PACid:17642179 | 3.385080002 | 5.66E-21  | 1.94E-19    |
| ppa009405m PACid:17649673 | 3.361023152 | 2.13E-22  | 7.83E-21    |
| ppa027059m PACid:17661470 | 3.348578131 | 1.69E-16  | 4.68E-15    |
| ppa016304m PACid:17640504 | 3.344699403 | 7.60E-07  | 9.37E-06    |
| ppa014605m PACid:17659609 | 3.325425539 | 2.95E-14  | 7.16E-13    |
| ppa008758m PACid:17651869 | 3.312113805 | 8.05E-05  | 0.000685552 |
| ppa025728m PACid:17642577 | 3.311292926 | 3.14E-34  | 1.68E-32    |
| ppa023006m PACid:17645227 | 3.293785131 | 1.42E-06  | 1.66E-05    |
| ppa010099m PACid:17652474 | 3.293785131 | 1.42E-06  | 1.66E-05    |
| ppa016354m PACid:17667664 | 3.269969472 | 4.97E-10  | 8.76E-09    |
| ppa006836m PACid:17649297 | 3.259674714 | 1.88E-13  | 4.35E-12    |
| ppa001841m PACid:17647655 | 3.249801144 | 2.98E-20  | 9.88E-19    |

---

|                           |             |             |             |
|---------------------------|-------------|-------------|-------------|
| ppa017252m PACid:17656265 | 3.2410081   | 2.64E-06    | 2.93E-05    |
| ppa018950m PACid:17664119 | 3.238079727 | 9.22E-10    | 1.59E-08    |
| ppa017146m PACid:17643976 | 3.223265459 | 3.49E-28    | 1.58E-26    |
| ppa010328m PACid:17668507 | 3.220453938 | 2.79E-139   | 9.62E-137   |
| ppa013722m PACid:17647538 | 3.218108535 | 2.52E-16    | 6.93E-15    |
| ppa009987m PACid:17655949 | 3.189479225 | 8.01E-108   | 2.02E-105   |
| ppa002544m PACid:17663600 | 3.186226814 | 4.89E-06    | 5.22E-05    |
| ppa022356m PACid:17665362 | 3.186226814 | 4.89E-06    | 5.22E-05    |
| ppa009698m PACid:17658186 | 3.186226814 | 4.89E-06    | 5.21E-05    |
| ppa003377m PACid:17667530 | 3.177113062 | 3.50E-65    | 3.75E-63    |
| ppa003805m PACid:17649186 | 3.171961269 | 4.31E-14    | 1.03E-12    |
| ppa006994m PACid:17646766 | 3.150779952 | 5.78E-17    | 1.64E-15    |
| ppa016888m PACid:17653515 | 3.098490275 | 0           | 0           |
| ppa026947m PACid:17668942 | 3.065845403 | 3.24E-14    | 7.86E-13    |
| ppa006746m PACid:17666547 | 3.062800787 | 5.62E-07    | 7.07E-06    |
| ppa002298m PACid:17669014 | 3.062800787 | 6.89E-10    | 1.20E-08    |
| ppa009745m PACid:17649428 | 3.040641984 | 3.09E-54    | 2.63E-52    |
| ppa005472m PACid:17646666 | 3.031548836 | 3.57E-08    | 5.20E-07    |
| ppa002187m PACid:17650626 | 3.014395643 | 4.28E-42    | 2.81E-40    |
| ppa008048m PACid:17665082 | 3.010210199 | 3.05E-05    | 0.000283244 |
| ppa004291m PACid:17641189 | 3.002036267 | 2.29E-09    | 3.83E-08    |
| ppa002353m PACid:17665436 | 3.001697089 | 1.56E-25    | 6.49E-24    |
| ppa010986m PACid:17643075 | 2.985814094 | 1.04E-69    | 1.28E-67    |
| ppa021895m PACid:17641301 | 2.970666506 | 1.88E-06    | 2.15E-05    |
| ppa017028m PACid:17646612 | 2.966907362 | 4.15E-31    | 2.05E-29    |
| ppa012612m PACid:17658654 | 2.957732486 | 1.09E-48    | 8.37E-47    |
| ppa018749m PACid:17663428 | 2.953933357 | 1.05E-16    | 2.93E-15    |
| ppa014216m PACid:17660129 | 2.949921579 | 1.29E-78    | 1.97E-76    |
| ppa009844m PACid:17651763 | 2.945709844 | 5.58E-05    | 0.000491113 |
| ppa009022m PACid:17664534 | 2.945709844 | 5.58E-05    | 0.000490755 |
| ppa004941m PACid:17664661 | 2.935459748 | 3.71E-25    | 1.50E-23    |
| ppa004306m PACid:17659262 | 2.908743293 | 8.74E-55    | 7.66E-53    |
| ppa009003m PACid:17661918 | 2.904171094 | 1.37E-08    | 2.09E-07    |
| ppa005031m PACid:17643115 | 2.878190283 | 0.000101478 | 0.000838392 |
| ppa010195m PACid:17665741 | 2.859626629 | 5.38E-145   | 2.03E-142   |
| ppa024083m PACid:17642369 | 2.853194999 | 3.60E-15    | 9.25E-14    |
| ppa012487m PACid:17646529 | 2.852606855 | 1.78E-90    | 3.37E-88    |
| ppa008322m PACid:17647011 | 2.850033174 | 8.14E-13    | 1.78E-11    |
| ppa011593m PACid:17652071 | 2.840338325 | 4.31E-16    | 1.16E-14    |
| ppa012765m PACid:17659944 | 2.837423244 | 4.04E-118   | 1.19E-115   |
| ppa021994m PACid:17665751 | 2.833750657 | 6.99E-07    | 8.65E-06    |
| ppa005402m PACid:17657424 | 2.823940881 | 7.72E-16    | 2.06E-14    |
| ppa020717m PACid:17649019 | 2.81724259  | 1.32E-35    | 7.21E-34    |
| ppa009905m PACid:17663475 | 2.807658871 | 1.57E-26    | 6.76E-25    |



|                           |             |             |             |
|---------------------------|-------------|-------------|-------------|
| ppa021967m PACid:17661398 | 2.800351534 | 8.00E-08    | 1.12E-06    |
| ppa000692m PACid:17647767 | 2.791549219 | 6.03E-10    | 1.05E-08    |
| ppa006386m PACid:17649503 | 2.790431619 | 1.26E-06    | 1.48E-05    |
| ppa009739m PACid:17668202 | 2.788966058 | 2.81E-29    | 1.33E-27    |
| ppa010731m PACid:17661078 | 2.788089063 | 5.35E-42    | 3.50E-40    |
| ppa018224m PACid:17662746 | 2.763015383 | 2.01E-05    | 0.000193583 |
| ppa006665m PACid:17660601 | 2.763015383 | 2.01E-05    | 0.000193429 |
| ppa022841m PACid:17665865 | 2.763015383 | 2.01E-05    | 0.000193275 |
| ppa007958m PACid:17658602 | 2.753652001 | 4.11E-24    | 1.60E-22    |
| ppa009106m PACid:17665424 | 2.745771492 | 2.25E-06    | 2.55E-05    |
| ppa007697m PACid:17654070 | 2.7112883   | 1.46E-93    | 2.90E-91    |
| ppa004336m PACid:17662282 | 2.707944001 | 3.60E-05    | 0.000329879 |
| ppa009934m PACid:17663557 | 2.707195326 | 4.93E-21    | 1.70E-19    |
| ppa010287m PACid:17662659 | 2.706192368 | 3.03E-217   | 1.83E-214   |
| ppa027017m PACid:17649955 | 2.699684578 | 4.02E-06    | 4.37E-05    |
| ppa001756m PACid:17657485 | 2.691292325 | 4.06E-205   | 2.14E-202   |
| ppa018400m PACid:17657800 | 2.670967067 | 2.97E-122   | 9.44E-120   |
| ppa012846m PACid:17643345 | 2.662350409 | 3.55E-83    | 5.87E-81    |
| ppa003684m PACid:17649014 | 2.658130779 | 1.01E-23    | 3.87E-22    |
| ppa010586m PACid:17658972 | 2.634463511 | 1.85E-47    | 1.36E-45    |
| ppa011310m PACid:17652259 | 2.61819883  | 1.89E-08    | 2.85E-07    |
| ppa002585m PACid:17661611 | 2.613293283 | 6.77E-50    | 5.38E-48    |
| ppa002340m PACid:17655370 | 2.612835678 | 1.13E-36    | 6.53E-35    |
| ppa021645m PACid:17656715 | 2.610750565 | 2.45E-24    | 9.60E-23    |
| ppa019732m PACid:17644727 | 2.607873599 | 1.43E-06    | 1.67E-05    |
| ppa002534m PACid:17664225 | 2.606325238 | 5.33E-11    | 1.02E-09    |
| ppa006149m PACid:17661849 | 2.596710161 | 3.87E-09    | 6.32E-08    |
| ppa016286m PACid:17651122 | 2.586998768 | 1.10E-11    | 2.23E-10    |
| ppa012362m PACid:17643910 | 2.586998768 | 0.000113872 | 0.000933136 |
| ppa004298m PACid:17665290 | 2.577577574 | 1.04E-27    | 4.62E-26    |
| ppa005749m PACid:17650906 | 2.569357067 | 1.82E-27    | 7.99E-26    |
| ppa004078m PACid:17641348 | 2.558092666 | 6.56E-33    | 3.33E-31    |
| ppa001327m PACid:17656420 | 2.554508704 | 4.00E-12    | 8.28E-11    |
| ppa011156m PACid:17662422 | 2.553544404 | 2.23E-05    | 0.000211542 |
| ppa010034m PACid:17653895 | 2.538414681 | 0           | 0           |
| ppa019653m PACid:17644724 | 2.537083096 | 5.14E-16    | 1.38E-14    |
| ppa009284m PACid:17669366 | 2.53449337  | 6.97E-12    | 1.42E-10    |
| ppa006905m PACid:17651659 | 2.522498414 | 4.41E-06    | 4.79E-05    |
| ppa019257m PACid:17655452 | 2.522498414 | 2.25E-17    | 6.51E-16    |
| ppa008715m PACid:17655161 | 2.507024833 | 8.83E-07    | 1.07E-05    |
| ppa005137m PACid:17663194 | 2.498045283 | 9.01E-78    | 1.33E-75    |
| ppa006352m PACid:17653826 | 2.494278568 | 2.11E-11    | 4.17E-10    |
| ppa006679m PACid:17666700 | 2.490515704 | 3.22E-38    | 1.92E-36    |
| ppa017516m PACid:17653116 | 2.487331934 | 1.16E-26    | 5.01E-25    |

---

|                           |             |             |             |
|---------------------------|-------------|-------------|-------------|
| ppa008147m PACid:17649944 | 2.476123555 | 3.93E-48    | 2.97E-46    |
| ppa011725m PACid:17663445 | 2.474937734 | 4.22E-234   | 3.00E-231   |
| ppa012433m PACid:17644508 | 2.455721935 | 3.08E-10    | 5.57E-09    |
| ppa007157m PACid:17645576 | 2.448847839 | 3.55E-21    | 1.23E-19    |
| ppa008636m PACid:17640963 | 2.445986088 | 6.83E-05    | 0.000591719 |
| ppa002847m PACid:17662760 | 2.445986088 | 6.83E-05    | 0.000591295 |
| ppa007671m PACid:17663378 | 2.445986088 | 6.83E-05    | 0.000590872 |
| ppa005683m PACid:17644017 | 2.445986088 | 6.83E-05    | 0.000590449 |
| ppa009872m PACid:17652907 | 2.445986088 | 6.83E-05    | 0.000590027 |
| ppa006903m PACid:17658689 | 2.445783448 | 2.89E-15    | 7.48E-14    |
| ppa001336m PACid:17652394 | 2.441987566 | 1.27E-08    | 1.95E-07    |
| ppa000260m PACid:17660438 | 2.439048473 | 2.60E-09    | 4.28E-08    |
| ppa011793m PACid:17666742 | 2.435887927 | 2.72E-50    | 2.20E-48    |
| ppa004285m PACid:17668433 | 2.432355517 | 5.63E-23    | 2.11E-21    |
| ppa001824m PACid:17642564 | 2.429843434 | 2.67E-06    | 2.96E-05    |
| ppa003854m PACid:17641906 | 2.414792788 | 1.66E-36    | 9.42E-35    |
| ppa002598m PACid:17667389 | 2.413366746 | 4.48E-09    | 7.22E-08    |
| ppa008273m PACid:17668407 | 2.405728697 | 6.47E-21    | 2.21E-19    |
| ppa008826m PACid:17665521 | 2.399591209 | 7.03E-60    | 6.90E-58    |
| ppa001828m PACid:17665676 | 2.390914705 | 0.00011867  | 0.000967206 |
| ppa002738m PACid:17648723 | 2.386746124 | 3.23E-10    | 5.83E-09    |
| ppa023881m PACid:17644592 | 2.385704005 | 2.33E-05    | 0.000219751 |
| ppa008472m PACid:17653732 | 2.375301446 | 1.55E-19    | 4.99E-18    |
| ppb010066m PACid:17651729 | 2.369144481 | 1.14E-36    | 6.54E-35    |
| ppa012242m PACid:17669132 | 2.36205896  | 1.00E-88    | 1.81E-86    |
| ppa005008m PACid:17667126 | 2.346922474 | 7.95E-06    | 8.22E-05    |
| ppa025709m PACid:17665691 | 2.344589903 | 5.44E-15    | 1.38E-13    |
| ppa013451m PACid:17668078 | 2.336525471 | 6.06E-13    | 1.34E-11    |
| ppa003682m PACid:17641618 | 2.309104055 | 1.16E-15    | 3.08E-14    |
| ppa003047m PACid:17658308 | 2.304925186 | 9.21E-22    | 3.35E-20    |
| ppa006294m PACid:17656965 | 2.303603437 | 1.36E-05    | 0.000135676 |
| ppa022569m PACid:17643626 | 2.285611199 | 6.89E-05    | 0.000594696 |
| ppa007273m PACid:17659637 | 2.271328927 | 4.67E-09    | 7.49E-08    |
| ppa003830m PACid:17655317 | 2.262554388 | 2.43E-11    | 4.79E-10    |
| ppa006759m PACid:17659157 | 2.259464008 | 2.28E-08    | 3.43E-07    |
| ppa007054m PACid:17666367 | 2.257024531 | 5.22E-61    | 5.21E-59    |
| ppa006313m PACid:17650503 | 2.243037938 | 2.98E-12    | 6.25E-11    |
| ppa027060m PACid:17651214 | 2.232834168 | 0.000117598 | 0.000960407 |
| ppa005437m PACid:17656870 | 2.224023507 | 9.56E-10    | 1.64E-08    |
| ppa027069m PACid:17656884 | 2.220482831 | 1.88E-07    | 2.50E-06    |
| ppa006263m PACid:17666726 | 2.218214785 | 1.36E-18    | 4.25E-17    |
| ppa006989m PACid:17645364 | 2.213567092 | 3.88E-49    | 3.00E-47    |
| ppa000657m PACid:17648606 | 2.212231919 | 1.64E-54    | 1.40E-52    |
| ppa010319m PACid:17665276 | 2.210114092 | 4.63E-09    | 7.44E-08    |

---

---

|                            |             |             |             |
|----------------------------|-------------|-------------|-------------|
| ppa004909m PACid:17645285  | 2.206586718 | 6.49E-08    | 9.21E-07    |
| ppa012860m PACid:17662261  | 2.205653671 | 0           | 0           |
| ppa000725m PACid:17654584  | 2.1928361   | 1.34E-05    | 0.000133466 |
| ppa011263m PACid:17655916  | 2.175642107 | 9.18E-31    | 4.49E-29    |
| ppa022307m PACid:17665608  | 2.17457511  | 4.06E-16    | 1.10E-14    |
| ppa003236m PACid:17645819  | 2.1672055   | 1.55E-06    | 1.81E-05    |
| ppa006370m PACid:17660238  | 2.166809028 | 6.69E-05    | 0.000580929 |
| ppa003011m PACid:17647193  | 2.166809028 | 6.69E-05    | 0.000580511 |
| ppa010155m PACid:17658379  | 2.158272681 | 4.51E-09    | 7.26E-08    |
| ppa005272m PACid:17644771  | 2.150779952 | 2.25E-05    | 0.000213892 |
| ppa007427m PACid:17651235  | 2.150779952 | 2.25E-05    | 0.000213725 |
| ppa011034m PACid:17649621  | 2.147743308 | 4.82E-12    | 9.90E-11    |
| ppa008187m PACid:17648690  | 2.143676811 | 7.65E-06    | 7.93E-05    |
| ppa010022m PACid:17660883  | 2.140835865 | 1.74E-33    | 9.08E-32    |
| ppa003992m PACid:17668992  | 2.135424926 | 7.53E-09    | 1.17E-07    |
| ppa007791m PACid:17662094  | 2.130453775 | 9.31E-20    | 3.04E-18    |
| ppa006894m PACid:17659692  | 2.120376425 | 3.08E-62    | 3.15E-60    |
| ppa008744m PACid:17648845  | 2.119239136 | 1.05E-07    | 1.45E-06    |
| ppa010066m PACid:17641455  | 2.118413225 | 4.73E-17    | 1.35E-15    |
| ppa009016m PACid:17657337  | 2.117630494 | 0.000112414 | 0.000921813 |
| ppa022249m PACid:17664055  | 2.112209504 | 1.25E-08    | 1.93E-07    |
| ppb022901m PACid:17669180  | 2.10363993  | 3.84E-48    | 2.92E-46    |
| ppa000285m PACid:17641496  | 2.102882681 | 5.22E-10    | 9.17E-09    |
| ppa001571m PACid:17649926  | 2.090667972 | 1.15E-13    | 2.67E-12    |
| ppa002201m PACid:17651679  | 2.088781375 | 1.31E-68    | 1.55E-66    |
| ppa005285m PACid:17644080  | 2.078961326 | 3.38E-68    | 3.93E-66    |
| ppa1027190m PACid:17647925 | 2.071845125 | 1.96E-23    | 7.44E-22    |
| ppa008338m PACid:17660922  | 2.06529146  | 2.46E-06    | 2.77E-05    |
| ppa014506m PACid:17643053  | 2.062800787 | 8.43E-07    | 1.03E-05    |
| ppa004373m PACid:17654058  | 2.055512428 | 2.22E-19    | 7.10E-18    |
| ppa009871m PACid:17649917  | 2.0442739   | 8.35E-18    | 2.50E-16    |
| ppa009849m PACid:17640310  | 2.038942242 | 5.53E-40    | 3.39E-38    |
| ppa002471m PACid:17645482  | 2.03718492  | 4.78E-07    | 6.06E-06    |
| ppa010379m PACid:17640308  | 2.033236329 | 1.39E-06    | 1.64E-05    |
| ppa011230m PACid:17651381  | 2.031926641 | 4.08E-06    | 4.43E-05    |
| ppa019687m PACid:17641026  | 2.028358555 | 3.43E-19    | 1.09E-17    |
| ppa013299m PACid:17662997  | 2.0256306   | 3.53E-05    | 0.000324546 |
| ppa006286m PACid:17658744  | 2.0256306   | 3.53E-05    | 0.000324299 |
| ppa008324m PACid:17643702  | 2.021437171 | 1.11E-08    | 1.72E-07    |
| ppa019639m PACid:17655055  | 2.016713874 | 0.000104629 | 0.000862068 |
| ppa007723m PACid:17654186  | 2.010615327 | 1.27E-27    | 5.58E-26    |
| ppa009067m PACid:17657150  | 2.005373172 | 6.44E-12    | 1.32E-10    |
| ppa013064m PACid:17668965  | 1.99640388  | 3.29E-98    | 6.97E-96    |
| ppa001765m PACid:17655910  | 1.992096606 | 1.49E-62    | 1.55E-60    |

---

---

|                           |             |           |             |
|---------------------------|-------------|-----------|-------------|
| ppa001527m PACid:17658170 | 1.987288948 | 2.57E-13  | 5.83E-12    |
| ppa011044m PACid:17648393 | 1.985973808 | 2.03E-30  | 9.91E-29    |
| ppa006512m PACid:17659307 | 1.975782604 | 1.27E-23  | 4.88E-22    |
| ppa005294m PACid:17667209 | 1.975324967 | 3.22E-157 | 1.34E-154   |
| ppa013708m PACid:17663915 | 1.970146522 | 3.76E-06  | 4.10E-05    |
| ppa011352m PACid:17643136 | 1.967179492 | 1.40E-10  | 2.62E-09    |
| ppa007860m PACid:17652672 | 1.965761247 | 5.88E-15  | 1.48E-13    |
| ppa005902m PACid:17660817 | 1.96531419  | 2.50E-07  | 3.29E-06    |
| ppa014503m PACid:17656023 | 1.964515019 | 1.64E-156 | 6.61E-154   |
| ppa013368m PACid:17668706 | 1.957425581 | 1.15E-09  | 1.97E-08    |
| ppa006672m PACid:17645548 | 1.940255414 | 9.54E-05  | 0.000793761 |
| ppa011722m PACid:17665133 | 1.932814488 | 4.45E-20  | 1.47E-18    |
| ppa007490m PACid:17658335 | 1.928387531 | 1.18E-06  | 1.40E-05    |
| ppa010085m PACid:17668703 | 1.928107082 | 1.80E-05  | 0.0001751   |
| ppa018617m PACid:17666468 | 1.923193705 | 1.09E-43  | 7.34E-42    |
| ppa013103m PACid:17667358 | 1.921487972 | 2.28E-07  | 3.01E-06    |
| ppa008016m PACid:17650754 | 1.917737038 | 1.23E-25  | 5.18E-24    |
| ppa009136m PACid:17658618 | 1.912345949 | 3.22E-16  | 8.76E-15    |
| ppa025857m PACid:17649431 | 1.911772817 | 5.28E-05  | 0.000466809 |
| ppa003431m PACid:17653591 | 1.911772817 | 5.28E-05  | 0.000466468 |
| ppa004326m PACid:17665938 | 1.904139985 | 2.49E-08  | 3.74E-07    |
| ppa009496m PACid:17650143 | 1.903940649 | 9.54E-88  | 1.67E-85    |
| ppa023908m PACid:17654425 | 1.899653175 | 1.91E-06  | 2.19E-05    |
| ppa012289m PACid:17665635 | 1.898068486 | 9.60E-10  | 1.65E-08    |
| ppa004942m PACid:17655293 | 1.897013567 | 2.43E-21  | 8.55E-20    |
| ppa006010m PACid:17643881 | 1.896255427 | 3.69E-07  | 4.74E-06    |
| ppa003015m PACid:17645696 | 1.89360719  | 7.16E-08  | 1.01E-06    |
| ppa010093m PACid:17649202 | 1.893545094 | 3.06E-51  | 2.51E-49    |
| ppa009854m PACid:17653845 | 1.883607288 | 7.64E-19  | 2.42E-17    |
| ppa005120m PACid:17652935 | 1.870908005 | 8.56E-05  | 0.000721408 |
| ppa007962m PACid:17645524 | 1.866004856 | 2.07E-28  | 9.46E-27    |
| ppa005990m PACid:17657699 | 1.862815621 | 2.48E-09  | 4.10E-08    |
| ppa010782m PACid:17665289 | 1.861394762 | 3.40E-15  | 8.76E-14    |
| ppa000787m PACid:17650148 | 1.859758808 | 2.54E-20  | 8.52E-19    |
| ppa023045m PACid:17659371 | 1.858656151 | 1.72E-06  | 1.98E-05    |
| ppa011093m PACid:17651028 | 1.853675358 | 4.72E-05  | 0.000422492 |
| ppa005609m PACid:17640450 | 1.853345826 | 2.40E-13  | 5.48E-12    |
| ppa007071m PACid:17658137 | 1.847824346 | 1.07E-22  | 3.96E-21    |
| ppa014606m PACid:17664257 | 1.841898353 | 2.02E-08  | 3.04E-07    |
| ppa000340m PACid:17643231 | 1.835464228 | 5.32E-07  | 6.71E-06    |
| ppa005392m PACid:17656199 | 1.823948896 | 2.96E-07  | 3.85E-06    |
| ppa004917m PACid:17665205 | 1.82101276  | 2.16E-36  | 1.22E-34    |
| ppa005030m PACid:17648649 | 1.817796669 | 1.53E-06  | 1.78E-05    |
| ppa005016m PACid:17647958 | 1.810843908 | 7.95E-06  | 8.23E-05    |

---

|                           |             |             |             |
|---------------------------|-------------|-------------|-------------|
| ppa011212m PACid:17664062 | 1.810231683 | 8.49E-07    | 1.03E-05    |
| ppa009417m PACid:17667850 | 1.809306662 | 3.91E-23    | 1.48E-21    |
| ppa005324m PACid:17651642 | 1.807866244 | 1.75E-40    | 1.10E-38    |
| ppa006660m PACid:17653187 | 1.80168355  | 5.13E-08    | 7.36E-07    |
| ppa011847m PACid:17652536 | 1.801370747 | 1.40E-16    | 3.88E-15    |
| ppa011780m PACid:17663806 | 1.801127452 | 6.21E-10    | 1.08E-08    |
| ppa006158m PACid:17662577 | 1.798319083 | 8.96E-18    | 2.68E-16    |
| ppa019519m PACid:17661868 | 1.797708272 | 5.46E-14    | 1.29E-12    |
| ppa003259m PACid:17668991 | 1.791837015 | 2.31E-25    | 9.45E-24    |
| ppa004860m PACid:17658520 | 1.791383173 | 4.27E-57    | 3.94E-55    |
| ppa010884m PACid:17644160 | 1.776578222 | 4.10E-97    | 8.54E-95    |
| ppa006253m PACid:17664541 | 1.776493958 | 0.000121466 | 0.000988658 |
| ppa010480m PACid:17648423 | 1.776361777 | 7.50E-07    | 9.26E-06    |
| ppa000586m PACid:17657979 | 1.763615631 | 6.66E-05    | 0.00057907  |
| ppa019611m PACid:17665964 | 1.761756631 | 7.63E-15    | 1.91E-13    |
| ppa006438m PACid:17656982 | 1.759627402 | 1.29E-07    | 1.75E-06    |
| ppa013690m PACid:17655287 | 1.753776137 | 1.88E-162   | 8.13E-160   |
| ppa007467m PACid:17651604 | 1.750860036 | 1.89E-13    | 4.36E-12    |
| ppa008777m PACid:17656518 | 1.74900642  | 2.06E-51    | 1.71E-49    |
| ppa008532m PACid:17659420 | 1.74723393  | 1.68E-12    | 3.57E-11    |
| ppa010245m PACid:17652873 | 1.741360336 | 4.28E-10    | 7.57E-09    |
| ppa003100m PACid:17646787 | 1.727679041 | 7.72E-20    | 2.53E-18    |
| ppa011717m PACid:17658055 | 1.72378     | 8.19E-14    | 1.92E-12    |
| ppa005160m PACid:17654206 | 1.723101418 | 1.15E-38    | 6.94E-37    |
| ppa006982m PACid:17664116 | 1.722211154 | 2.14E-19    | 6.86E-18    |
| ppa012991m PACid:17659024 | 1.721580052 | 0           | 0           |
| ppa006424m PACid:17652757 | 1.718726476 | 6.04E-09    | 9.53E-08    |
| ppa001275m PACid:17659742 | 1.715143492 | 3.18E-05    | 0.000294462 |
| ppa011708m PACid:17651175 | 1.715143492 | 3.18E-05    | 0.000294237 |
| ppa007548m PACid:17655717 | 1.715143492 | 3.18E-05    | 0.000294012 |
| ppa002878m PACid:17659526 | 1.714241058 | 4.99E-59    | 4.83E-57    |
| ppa002385m PACid:17641472 | 1.71293932  | 1.75E-05    | 0.00017091  |
| ppa003782m PACid:17654827 | 1.707320132 | 5.47E-08    | 7.83E-07    |
| ppa003910m PACid:17640619 | 1.706211056 | 6.95E-24    | 2.68E-22    |
| ppa012166m PACid:17662798 | 1.70349809  | 5.18E-74    | 6.80E-72    |
| ppa009500m PACid:17661103 | 1.702897338 | 1.70E-08    | 2.57E-07    |
| ppa005789m PACid:17642531 | 1.699646811 | 1.63E-06    | 1.88E-05    |
| ppa003457m PACid:17664615 | 1.686756502 | 9.13E-05    | 0.000762467 |
| ppa007720m PACid:17666080 | 1.686756502 | 9.13E-05    | 0.00076194  |
| ppa010015m PACid:17648027 | 1.683117193 | 2.19E-45    | 1.56E-43    |
| ppa005470m PACid:17656374 | 1.681778673 | 5.00E-05    | 0.000446108 |
| ppa005286m PACid:17654365 | 1.680213601 | 3.15E-65    | 3.40E-63    |
| ppa012548m PACid:17658002 | 1.677689785 | 1.51E-05    | 0.000149185 |
| ppa006895m PACid:17662466 | 1.672379642 | 7.80E-07    | 9.59E-06    |

---

|                           |             |             |             |
|---------------------------|-------------|-------------|-------------|
| ppa003610m PACid:17654292 | 1.671945802 | 1.41E-06    | 1.65E-05    |
| ppa000468m PACid:17650750 | 1.669851398 | 4.32E-07    | 5.51E-06    |
| ppa012449m PACid:17668812 | 1.668753325 | 1.33E-63    | 1.40E-61    |
| ppa001976m PACid:17650566 | 1.668053149 | 4.13E-14    | 9.95E-13    |
| ppa011723m PACid:17643268 | 1.658211483 | 2.01E-14    | 4.94E-13    |
| ppa008791m PACid:17643209 | 1.655965872 | 1.84E-121   | 5.72E-119   |
| ppa012574m PACid:17652999 | 1.652207063 | 5.36E-74    | 6.97E-72    |
| ppa004229m PACid:17654065 | 1.649312912 | 1.10E-08    | 1.71E-07    |
| ppa003664m PACid:17654382 | 1.648998981 | 1.71E-18    | 5.31E-17    |
| ppa017571m PACid:17668125 | 1.648738411 | 7.83E-05    | 0.000669616 |
| ppa002923m PACid:17649241 | 1.647958365 | 2.19E-06    | 2.49E-05    |
| ppa000820m PACid:17663080 | 1.636616141 | 6.68E-30    | 3.22E-28    |
| ppa007035m PACid:17656271 | 1.63085287  | 1.47E-284   | 1.11E-281   |
| ppa001412m PACid:17642131 | 1.630194265 | 1.31E-88    | 2.34E-86    |
| ppa018286m PACid:17645875 | 1.621624217 | 1.11E-05    | 0.000112891 |
| ppa009834m PACid:17641050 | 1.621119118 | 3.55E-14    | 8.59E-13    |
| ppa007235m PACid:17657810 | 1.618682291 | 5.36E-17    | 1.53E-15    |
| ppa008438m PACid:17642352 | 1.613782777 | 0.000121983 | 0.000992198 |
| ppa008886m PACid:17667313 | 1.613782777 | 0.000121983 | 0.000991531 |
| ppa012923m PACid:17649658 | 1.610983284 | 1.34E-49    | 1.05E-47    |
| ppa003788m PACid:17641669 | 1.609740481 | 4.63E-16    | 1.24E-14    |
| ppa008642m PACid:17646866 | 1.606399671 | 2.18E-09    | 3.63E-08    |
| ppa016730m PACid:17659022 | 1.604100573 | 1.61E-06    | 1.86E-05    |
| ppa007227m PACid:17662542 | 1.601701717 | 1.25E-08    | 1.92E-07    |
| ppa017186m PACid:17658778 | 1.589403844 | 5.98E-09    | 9.44E-08    |
| ppa023043m PACid:17651473 | 1.586998768 | 5.68E-05    | 0.000498572 |
| ppa017605m PACid:17652765 | 1.586998768 | 5.68E-05    | 0.000498211 |
| ppa010530m PACid:17665723 | 1.585264541 | 1.09E-13    | 2.55E-12    |
| ppa000080m PACid:17667623 | 1.57873391  | 4.47E-06    | 4.82E-05    |
| ppa001833m PACid:17641170 | 1.578291067 | 1.97E-12    | 4.17E-11    |
| ppa000099m PACid:17650267 | 1.577959113 | 1.11E-07    | 1.53E-06    |
| ppa005700m PACid:17655040 | 1.577432199 | 1.85E-18    | 5.71E-17    |
| ppa008525m PACid:17651173 | 1.574321615 | 7.94E-169   | 3.56E-166   |
| ppa010274m PACid:17666750 | 1.562227188 | 7.78E-09    | 1.21E-07    |
| ppa002202m PACid:17667115 | 1.557887259 | 1.32E-56    | 1.20E-54    |
| ppa012613m PACid:17661392 | 1.555109023 | 8.75E-05    | 0.000736128 |
| ppa013340m PACid:17642934 | 1.551499742 | 9.16E-55    | 7.97E-53    |
| ppa007880m PACid:17651364 | 1.550956329 | 1.34E-15    | 3.52E-14    |
| ppa004821m PACid:17650013 | 1.548645605 | 1.24E-05    | 0.00012419  |
| ppa004490m PACid:17661677 | 1.547630875 | 5.84E-13    | 1.30E-11    |
| ppa010221m PACid:17643128 | 1.544320516 | 1.78E-06    | 2.05E-05    |
| ppa010944m PACid:17641470 | 1.538442206 | 5.62E-09    | 8.94E-08    |
| ppa025683m PACid:17652395 | 1.537985492 | 1.38E-116   | 3.72E-114   |
| ppa011893m PACid:17645079 | 1.533553833 | 1.54E-78    | 2.33E-76    |

---

|                            |             |           |             |
|----------------------------|-------------|-----------|-------------|
| ppa006034m PACid:17661265  | 1.532611185 | 8.37E-07  | 1.02E-05    |
| ppa010078m PACid:17641248  | 1.531266904 | 1.22E-07  | 1.67E-06    |
| ppa000771m PACid:17645318  | 1.530291855 | 3.38E-17  | 9.74E-16    |
| ppa1027211m PACid:17661916 | 1.523857524 | 8.51E-09  | 1.32E-07    |
| ppa004833m PACid:17658938  | 1.519554409 | 5.46E-22  | 1.99E-20    |
| ppa016609m PACid:17646065  | 1.517275693 | 3.42E-05  | 0.00031525  |
| ppa011193m PACid:17646869  | 1.511058153 | 3.61E-90  | 6.61E-88    |
| ppa004637m PACid:17646982  | 1.50864528  | 3.11E-17  | 8.98E-16    |
| ppa004568m PACid:17663074  | 1.504149986 | 9.68E-30  | 4.62E-28    |
| ppa001810m PACid:17648315  | 1.50060386  | 1.26E-17  | 3.69E-16    |
| ppa003899m PACid:17659080  | 1.500140058 | 4.34E-48  | 3.26E-46    |
| ppa000255m PACid:17654036  | 1.496446461 | 2.80E-07  | 3.66E-06    |
| ppa000656m PACid:17660986  | 1.490170118 | 7.43E-14  | 1.75E-12    |
| ppa002350m PACid:17656726  | 1.487987687 | 4.91E-13  | 1.10E-11    |
| ppa004703m PACid:17666113  | 1.487445995 | 2.49E-38  | 1.49E-36    |
| ppa006299m PACid:17665488  | 1.483632953 | 6.97E-31  | 3.43E-29    |
| ppa006328m PACid:17662823  | 1.482769155 | 2.51E-21  | 8.80E-20    |
| ppa007653m PACid:17662855  | 1.47942115  | 2.04E-09  | 3.41E-08    |
| ppa003796m PACid:17665462  | 1.47942115  | 2.41E-05  | 0.000227    |
| ppa012591m PACid:17641346  | 1.478796551 | 2.08E-143 | 7.60E-141   |
| ppa007177m PACid:17667690  | 1.478423439 | 4.22E-07  | 5.39E-06    |
| ppa004544m PACid:17643196  | 1.474594563 | 3.40E-78  | 5.07E-76    |
| ppa002453m PACid:17647608  | 1.472151182 | 8.66E-12  | 1.76E-10    |
| ppa002985m PACid:17654476  | 1.469283888 | 1.54E-11  | 3.08E-10    |
| ppa002142m PACid:17668526  | 1.46518036  | 1.12E-44  | 7.65E-43    |
| ppa006651m PACid:17655734  | 1.465122731 | 1.15E-08  | 1.78E-07    |
| ppa004571m PACid:17653993  | 1.462930005 | 2.94E-16  | 8.04E-15    |
| ppa010404m PACid:17660705  | 1.462797527 | 1.66E-07  | 2.23E-06    |
| ppa017924m PACid:17661839  | 1.455686872 | 4.72E-14  | 1.13E-12    |
| ppa013301m PACid:17663848  | 1.445180133 | 4.81E-10  | 8.48E-09    |
| ppa013356m PACid:17664380  | 1.442350404 | 2.87E-11  | 5.63E-10    |
| ppa021958m PACid:17653020  | 1.438520224 | 5.09E-11  | 9.74E-10    |
| ppa001535m PACid:17645027  | 1.429486412 | 7.81E-30  | 3.75E-28    |
| ppa009692m PACid:17654407  | 1.428118144 | 7.55E-11  | 1.43E-09    |
| ppa009353m PACid:17644381  | 1.414425799 | 4.64E-15  | 1.18E-13    |
| ppa1027122m PACid:17662689 | 1.411616537 | 6.16E-26  | 2.61E-24    |
| ppa010827m PACid:17667612  | 1.411142081 | 4.52E-05  | 0.000405741 |
| ppa007118m PACid:17651724  | 1.409612748 | 1.22E-17  | 3.58E-16    |
| ppa002674m PACid:17657248  | 1.407681125 | 2.23E-12  | 4.69E-11    |
| ppa008787m PACid:17651814  | 1.400396669 | 8.13E-05  | 0.000692006 |
| ppa007127m PACid:17665180  | 1.397806676 | 1.10E-09  | 1.87E-08    |
| ppa007519m PACid:17646051  | 1.394504554 | 8.17E-07  | 1.00E-05    |
| ppa001973m PACid:17652447  | 1.393914208 | 3.82E-07  | 4.91E-06    |
| ppa009903m PACid:17655203  | 1.392023505 | 1.65E-55  | 1.48E-53    |

---

|                           |             |          |             |
|---------------------------|-------------|----------|-------------|
| ppa012973m PACid:17659839 | 1.38590815  | 8.60E-77 | 1.18E-74    |
| ppa009850m PACid:17662201 | 1.385838806 | 1.80E-11 | 3.57E-10    |
| ppa006177m PACid:17667329 | 1.379264094 | 1.29E-08 | 1.97E-07    |
| ppa000775m PACid:17642849 | 1.377199382 | 5.92E-12 | 1.22E-10    |
| ppa005584m PACid:17662113 | 1.370666012 | 2.08E-13 | 4.78E-12    |
| ppa002583m PACid:17662966 | 1.368936645 | 4.90E-28 | 2.19E-26    |
| ppa008320m PACid:17653469 | 1.367063008 | 2.15E-06 | 2.44E-05    |
| ppa014283m PACid:17669250 | 1.360864739 | 1.44E-10 | 2.69E-09    |
| ppa002034m PACid:17647482 | 1.359684111 | 1.78E-06 | 2.05E-05    |
| ppa007900m PACid:17655851 | 1.350826141 | 6.13E-28 | 2.73E-26    |
| ppa001897m PACid:17650737 | 1.348075286 | 8.24E-05 | 0.00069908  |
| ppa011637m PACid:17656391 | 1.344834517 | 1.21E-20 | 4.10E-19    |
| ppa010515m PACid:17660684 | 1.344589903 | 1.04E-07 | 1.44E-06    |
| ppa007547m PACid:17664654 | 1.34342503  | 1.46E-05 | 0.000143942 |
| ppa020645m PACid:17657493 | 1.340244718 | 3.14E-05 | 0.000291014 |
| ppa001849m PACid:17661386 | 1.336525471 | 6.79E-05 | 0.000588861 |
| ppa006089m PACid:17664790 | 1.332634304 | 2.12E-10 | 3.91E-09    |
| ppa007068m PACid:17660515 | 1.331322085 | 2.59E-05 | 0.000243489 |
| ppa006888m PACid:17658940 | 1.328951941 | 1.11E-21 | 4.02E-20    |
| ppa011762m PACid:17654448 | 1.326446537 | 1.55E-87 | 2.68E-85    |
| ppa004473m PACid:17668713 | 1.326090675 | 4.20E-17 | 1.21E-15    |
| ppa002769m PACid:17668075 | 1.324899661 | 1.32E-66 | 1.51E-64    |
| ppa002424m PACid:17646139 | 1.318318992 | 1.38E-09 | 2.34E-08    |
| ppa010824m PACid:17667635 | 1.317404748 | 5.72E-07 | 7.17E-06    |
| ppa016117m PACid:17665168 | 1.317313313 | 3.16E-06 | 3.47E-05    |
| ppa006101m PACid:17658859 | 1.314000418 | 1.73E-26 | 7.46E-25    |
| ppa000393m PACid:17659059 | 1.311292926 | 9.97E-05 | 0.000827503 |
| ppa008288m PACid:17661968 | 1.311292926 | 9.97E-05 | 0.000826935 |
| ppa013712m PACid:17662863 | 1.310046472 | 1.83E-07 | 2.44E-06    |
| ppa007181m PACid:17667360 | 1.308469055 | 1.01E-06 | 1.21E-05    |
| ppa013099m PACid:17662664 | 1.305863378 | 1.45E-05 | 0.000143677 |
| ppa007610m PACid:17653774 | 1.305863378 | 1.45E-05 | 0.00014356  |
| ppa004751m PACid:17664865 | 1.30533713  | 5.83E-21 | 2.00E-19    |
| ppa003695m PACid:17663413 | 1.300586463 | 1.54E-11 | 3.08E-10    |
| ppa011474m PACid:17661144 | 1.294374965 | 1.57E-08 | 2.38E-07    |
| ppa003252m PACid:17666502 | 1.291982694 | 3.79E-06 | 4.13E-05    |
| ppa006064m PACid:17650663 | 1.289877271 | 8.86E-26 | 3.73E-24    |
| ppa012979m PACid:17645788 | 1.28636691  | 1.21E-06 | 1.44E-05    |
| ppa002401m PACid:17652702 | 1.285945505 | 2.11E-05 | 0.000203004 |
| ppa009110m PACid:17643985 | 1.282044699 | 5.82E-08 | 8.29E-07    |
| ppa010752m PACid:17667911 | 1.277533976 | 1.23E-07 | 1.68E-06    |
| ppa006421m PACid:17647678 | 1.274752851 | 5.50E-06 | 5.82E-05    |
| ppa006520m PACid:17653922 | 1.269591608 | 4.52E-06 | 4.86E-05    |
| ppa006726m PACid:17649419 | 1.269446742 | 9.80E-05 | 0.000814077 |

---



---

|                           |             |             |             |
|---------------------------|-------------|-------------|-------------|
| ppa005787m PACid:17656114 | 1.249516482 | 5.12E-36    | 2.84E-34    |
| ppa001815m PACid:17652194 | 1.243889357 | 4.43E-05    | 0.000398306 |
| ppa010551m PACid:17644046 | 1.243348611 | 1.73E-07    | 2.31E-06    |
| ppa004526m PACid:17664321 | 1.240593948 | 1.43E-07    | 1.93E-06    |
| ppa018884m PACid:17667611 | 1.237723317 | 3.62E-06    | 3.95E-05    |
| ppa001577m PACid:17647242 | 1.233050903 | 2.98E-05    | 0.000276696 |
| ppa004528m PACid:17642861 | 1.230043288 | 2.44E-06    | 2.75E-05    |
| ppa016100m PACid:17664699 | 1.228166096 | 7.78E-05    | 0.000665849 |
| ppa001957m PACid:17665341 | 1.225555214 | 1.27E-35    | 6.99E-34    |
| ppa011368m PACid:17665965 | 1.219807218 | 2.46E-12    | 5.18E-11    |
| ppa005627m PACid:17658765 | 1.218553963 | 5.22E-05    | 0.000461817 |
| ppa007450m PACid:17644102 | 1.21115612  | 3.81E-39    | 2.31E-37    |
| ppa007970m PACid:17655333 | 1.210505355 | 7.73E-13    | 1.70E-11    |
| ppa020825m PACid:17652478 | 1.208896233 | 9.02E-06    | 9.28E-05    |
| ppa018908m PACid:17667971 | 1.206394631 | 0.00011168  | 0.00091641  |
| ppa008730m PACid:17657884 | 1.204630679 | 2.13E-10    | 3.91E-09    |
| ppa001094m PACid:17663374 | 1.20179346  | 6.06E-06    | 6.38E-05    |
| ppa010868m PACid:17642911 | 1.198153543 | 4.97E-06    | 5.29E-05    |
| ppa007013m PACid:17665763 | 1.19733932  | 1.08E-65    | 1.18E-63    |
| ppa000893m PACid:17648620 | 1.195829334 | 1.06E-06    | 1.28E-05    |
| ppa008159m PACid:17658015 | 1.193924706 | 2.12E-49    | 1.65E-47    |
| ppa007930m PACid:17647761 | 1.189397957 | 4.99E-05    | 0.000444916 |
| ppa018805m PACid:17660504 | 1.185747039 | 2.22E-13    | 5.10E-12    |
| ppa011844m PACid:17652196 | 1.185745519 | 8.62E-06    | 8.89E-05    |
| ppa012535m PACid:17653141 | 1.175378368 | 5.72E-45    | 3.95E-43    |
| ppa008537m PACid:17656421 | 1.175317495 | 1.14E-35    | 6.31E-34    |
| ppa006450m PACid:17668721 | 1.173131704 | 3.96E-15    | 1.01E-13    |
| ppa000157m PACid:17655669 | 1.170761104 | 1.49E-05    | 0.000147335 |
| ppa011865m PACid:17664690 | 1.167763012 | 1.86E-33    | 9.67E-32    |
| ppa007605m PACid:17654073 | 1.167638569 | 1.98E-21    | 7.00E-20    |
| ppa003639m PACid:17643967 | 1.16616748  | 2.80E-40    | 1.75E-38    |
| ppa012596m PACid:17665075 | 1.164975106 | 3.08E-07    | 3.99E-06    |
| ppa008769m PACid:17660321 | 1.164488155 | 1.19E-227   | 7.55E-225   |
| ppa004936m PACid:17653005 | 1.163722272 | 3.88E-46    | 2.81E-44    |
| ppa003097m PACid:17644399 | 1.161854874 | 1.17E-06    | 1.40E-05    |
| ppa010812m PACid:17646625 | 1.152363593 | 3.02E-11    | 5.92E-10    |
| ppa012919m PACid:17668169 | 1.152240594 | 4.51E-12    | 9.30E-11    |
| ppa003820m PACid:17662926 | 1.151799165 | 2.46E-06    | 2.77E-05    |
| ppa009090m PACid:17646603 | 1.149183155 | 0.000100401 | 0.000832338 |
| ppa002376m PACid:17644619 | 1.149183155 | 0.000100401 | 0.000831768 |
| ppa009289m PACid:17654883 | 1.148089731 | 2.86E-08    | 4.25E-07    |
| ppa005358m PACid:17644469 | 1.145544153 | 7.76E-13    | 1.70E-11    |
| ppa007655m PACid:17650870 | 1.145446025 | 9.44E-06    | 9.68E-05    |
| ppa010633m PACid:17668143 | 1.14231642  | 5.46E-05    | 0.000481655 |

---

---

|                           |             |            |             |
|---------------------------|-------------|------------|-------------|
| ppa013271m PACid:17654126 | 1.141368557 | 5.70E-17   | 1.62E-15    |
| ppa011969m PACid:17668402 | 1.138973782 | 7.87E-77   | 1.09E-74    |
| ppa003294m PACid:17653373 | 1.136586071 | 3.98E-11   | 7.72E-10    |
| ppa004404m PACid:17645715 | 1.13290278  | 1.20E-19   | 3.88E-18    |
| ppa001286m PACid:17652397 | 1.12673023  | 0.00011544 | 0.000943422 |
| ppa010399m PACid:17651736 | 1.124098927 | 5.93E-06   | 6.25E-05    |
| ppa009610m PACid:17664431 | 1.123064809 | 4.85E-06   | 5.18E-05    |
| ppa008618m PACid:17667519 | 1.122676521 | 2.48E-14   | 6.05E-13    |
| ppa007076m PACid:17641383 | 1.116229807 | 1.59E-10   | 2.96E-09    |
| ppa010928m PACid:17656430 | 1.109218227 | 8.28E-06   | 8.55E-05    |
| ppa003574m PACid:17649082 | 1.100860042 | 2.51E-10   | 4.59E-09    |
| ppa000383m PACid:17648534 | 1.100536233 | 1.07E-17   | 3.17E-16    |
| ppa004955m PACid:17653696 | 1.097870513 | 2.28E-28   | 1.04E-26    |
| ppa002531m PACid:17666143 | 1.097595698 | 6.92E-21   | 2.36E-19    |
| ppa003657m PACid:17655447 | 1.096418578 | 1.84E-07   | 2.45E-06    |
| ppa008417m PACid:17654884 | 1.088884819 | 2.84E-09   | 4.66E-08    |
| ppa010500m PACid:17657393 | 1.087526792 | 1.57E-09   | 2.65E-08    |
| ppa006262m PACid:17656841 | 1.084417822 | 4.99E-14   | 1.19E-12    |
| ppa004363m PACid:17642533 | 1.084072034 | 1.92E-64   | 2.03E-62    |
| ppa000665m PACid:17650265 | 1.082287911 | 8.14E-05   | 0.000692026 |
| ppa010473m PACid:17651461 | 1.076830685 | 0          | 0           |
| ppa004524m PACid:17645797 | 1.065184506 | 6.29E-51   | 5.14E-49    |
| ppa016011m PACid:17644681 | 1.064130337 | 1.21E-05   | 0.000121399 |
| ppa000637m PACid:17650039 | 1.064130337 | 8.07E-08   | 1.13E-06    |
| ppa002334m PACid:17662100 | 1.061185501 | 4.25E-23   | 1.60E-21    |
| ppa009971m PACid:17654547 | 1.055521947 | 1.25E-08   | 1.92E-07    |
| ppa013113m PACid:17661996 | 1.053328052 | 4.48E-07   | 5.70E-06    |
| ppb023395m PACid:17663996 | 1.049113501 | 2.50E-05   | 0.000235515 |
| ppa003730m PACid:17647793 | 1.046422396 | 2.54E-08   | 3.80E-07    |
| ppa013232m PACid:17664682 | 1.04535675  | 1.02E-07   | 1.42E-06    |
| ppa011227m PACid:17656249 | 1.045280879 | 5.09E-11   | 9.73E-10    |
| ppa008719m PACid:17652237 | 1.044738315 | 1.36E-10   | 2.55E-09    |
| ppa004451m PACid:17656143 | 1.043954675 | 3.00E-10   | 5.44E-09    |
| ppa007520m PACid:17645059 | 1.042821627 | 7.51E-07   | 9.26E-06    |
| ppa001692m PACid:17655278 | 1.037937593 | 3.47E-08   | 5.08E-07    |
| ppa001186m PACid:17657648 | 1.036870779 | 4.06E-12   | 8.40E-11    |
| ppa007844m PACid:17649204 | 1.033757632 | 3.44E-05   | 0.000316486 |
| ppa003265m PACid:17646993 | 1.031305348 | 0          | 0           |
| ppa007591m PACid:17651555 | 1.030648305 | 1.22E-13   | 2.83E-12    |
| ppa014856m PACid:17658962 | 1.02888059  | 1.61E-40   | 1.02E-38    |
| ppa021469m PACid:17645617 | 1.02816353  | 3.95E-11   | 7.67E-10    |
| ppa005350m PACid:17648711 | 1.025526056 | 7.29E-09   | 1.14E-07    |
| ppa005277m PACid:17650866 | 1.021860139 | 1.19E-21   | 4.29E-20    |
| ppa002527m PACid:17647771 | 1.021072044 | 1.15E-06   | 1.37E-05    |

---

---

|                           |              |          |             |
|---------------------------|--------------|----------|-------------|
| ppa006873m PACid:17641291 | 1.017929458  | 1.43E-07 | 1.93E-06    |
| ppa010918m PACid:17660241 | 1.016397444  | 7.07E-05 | 0.000609831 |
| ppa004924m PACid:17651293 | 1.010637431  | 9.44E-10 | 1.62E-08    |
| ppa008102m PACid:17650351 | 1.007900105  | 2.53E-09 | 4.18E-08    |
| ppa006860m PACid:17658416 | 1.007508467  | 2.97E-08 | 4.40E-07    |
| ppa017449m PACid:17652377 | 1.004772957  | 6.57E-08 | 9.32E-07    |
| ppa002140m PACid:17657831 | 1.00305548   | 6.44E-05 | 0.000562285 |
| ppa004926m PACid:17648238 | 1.002715918  | 8.54E-15 | 2.13E-13    |
| ppa005434m PACid:17642225 | 1.002376484  | 9.57E-07 | 1.16E-05    |
| ppa004555m PACid:17659130 | 1.000680998  | 4.17E-33 | 2.13E-31    |
| ppa012515m PACid:17641010 | 1.000526051  | 2.71E-08 | 4.03E-07    |
| ppa009635m PACid:17650061 | 1.000421779  | 1.16E-05 | 0.000117187 |
| ppa017472m PACid:17648324 | -11.67639789 | 4.49E-33 | 2.29E-31    |
| ppa010154m PACid:17662227 | -11.43671154 | 4.06E-28 | 1.82E-26    |
| ppa011095m PACid:17659760 | -11.16741815 | 1.87E-23 | 7.11E-22    |
| ppa024234m PACid:17653614 | -11.09143539 | 2.74E-22 | 1.00E-20    |
| ppa025143m PACid:17643435 | -10.83605036 | 8.63E-19 | 2.72E-17    |
| ppa005901m PACid:17648495 | -10.76487159 | 6.47E-18 | 1.96E-16    |
| ppa008626m PACid:17650701 | -10.6635581  | 9.48E-17 | 2.66E-15    |
| ppa027164m PACid:17643882 | -10.37395266 | 7.79E-14 | 1.83E-12    |
| ppa023758m PACid:17664707 | -10.2737956  | 5.84E-13 | 1.30E-11    |
| ppa002363m PACid:17661991 | -10.01122726 | 6.41E-11 | 1.22E-09    |
| ppa017806m PACid:17649435 | -9.968666793 | 1.25E-10 | 2.35E-09    |
| ppa020537m PACid:17643147 | -9.882643049 | 4.80E-10 | 8.48E-09    |
| ppa004406m PACid:17657235 | -9.789533645 | 1.84E-09 | 3.09E-08    |
| ppa012577m PACid:17663752 | -9.636624621 | 1.38E-08 | 2.10E-07    |
| ppa019204m PACid:17648651 | -9.583082768 | 2.69E-08 | 4.02E-07    |
| ppa021383m PACid:17655177 | -9.583082768 | 2.69E-08 | 4.02E-07    |
| ppa027063m PACid:17656719 | -9.525520809 | 5.27E-08 | 7.55E-07    |
| ppa009350m PACid:17665845 | -9.46760555  | 1.03E-07 | 1.43E-06    |
| ppa022459m PACid:17648375 | -9.46760555  | 1.03E-07 | 1.43E-06    |
| ppa023213m PACid:17664985 | -9.342074668 | 3.95E-07 | 5.07E-06    |
| ppa003161m PACid:17657850 | -9.273795599 | 7.73E-07 | 9.51E-06    |
| ppa013235m PACid:17656256 | -9.204571144 | 1.51E-06 | 1.76E-05    |
| ppa020980m PACid:17643110 | -9.204571144 | 1.51E-06 | 1.76E-05    |
| ppa018706m PACid:17655617 | -9.129283017 | 2.96E-06 | 3.26E-05    |
| ppa011770m PACid:17664672 | -9.129283017 | 2.96E-06 | 3.26E-05    |
| ppa019215m PACid:17657563 | -9.129283017 | 2.96E-06 | 3.25E-05    |
| ppa011822m PACid:17642112 | -9.052568051 | 5.79E-06 | 6.11E-05    |
| ppb012748m PACid:17656298 | -8.968666793 | 1.13E-05 | 0.000114618 |
| ppa022398m PACid:17664899 | -8.968666793 | 1.13E-05 | 0.000114522 |
| ppa006577m PACid:17662230 | -8.882643049 | 2.22E-05 | 0.000211007 |
| ppa010908m PACid:17646716 | -8.882643049 | 2.22E-05 | 0.000210841 |
| ppa026487m PACid:17650291 | -8.882643049 | 2.22E-05 | 0.000210675 |

---

---

|                           |              |           |             |
|---------------------------|--------------|-----------|-------------|
| ppa015371m PACid:17668071 | -8.787902559 | 4.33E-05  | 0.000394222 |
| ppa016881m PACid:17641647 | -8.787902559 | 4.33E-05  | 0.000393925 |
| ppa012926m PACid:17659376 | -8.787902559 | 4.33E-05  | 0.000393629 |
| ppa019793m PACid:17654943 | -8.689997971 | 8.48E-05  | 0.000718871 |
| ppa006133m PACid:17653743 | -8.689997971 | 8.48E-05  | 0.000718368 |
| ppa006231m PACid:17642062 | -8.689997971 | 8.48E-05  | 0.000717865 |
| ppa001642m PACid:17666712 | -8.689997971 | 8.48E-05  | 0.000717362 |
| ppa014982m PACid:17659372 | -8.689997971 | 8.48E-05  | 0.000716861 |
| ppa022925m PACid:17649685 | -8.689997971 | 8.48E-05  | 0.00071636  |
| ppa022323m PACid:17648014 | -8.689997971 | 8.48E-05  | 0.000715859 |
| ppa001076m PACid:17658297 | -8.689997971 | 8.48E-05  | 0.00071536  |
| ppa012767m PACid:17665694 | -5.267390811 | 2.13E-21  | 7.52E-20    |
| ppa009513m PACid:17652409 | -5.143068155 | 3.01E-74  | 4.05E-72    |
| ppa019171m PACid:17640976 | -5.089186697 | 4.54E-36  | 2.53E-34    |
| ppa010410m PACid:17662220 | -4.958237476 | 1.09E-24  | 4.34E-23    |
| ppa005351m PACid:17667368 | -4.943534078 | 2.07E-24  | 8.11E-23    |
| ppa018214m PACid:17646113 | -4.875994902 | 2.67E-60  | 2.65E-58    |
| ppa000438m PACid:17649984 | -4.833990049 | 1.83E-22  | 6.75E-21    |
| ppa022767m PACid:17643388 | -4.796795079 | 1.34E-118 | 4.06E-116   |
| ppa001116m PACid:17662999 | -4.689350936 | 1.17E-45  | 8.38E-44    |
| ppa000513m PACid:17644392 | -4.600392541 | 4.94E-13  | 1.11E-11    |
| ppa018679m PACid:17664669 | -4.542657467 | 1.76E-12  | 3.73E-11    |
| ppa008693m PACid:17655029 | -4.527911357 | 3.71E-40  | 2.29E-38    |
| ppa005514m PACid:17648384 | -4.338302877 | 0         | 0           |
| ppa006985m PACid:17643741 | -4.249151693 | 5.07E-10  | 8.92E-09    |
| ppa026927m PACid:17661024 | -4.20994824  | 8.96E-99  | 1.97E-96    |
| ppa011331m PACid:17654316 | -4.175086707 | 1.77E-09  | 2.97E-08    |
| ppa024899m PACid:17656297 | -4.007445996 | 2.03E-72  | 2.61E-70    |
| ppa006439m PACid:17652112 | -3.972099684 | 3.92E-08  | 5.68E-07    |
| ppa016155m PACid:17642177 | -3.89463894  | 8.43E-37  | 4.90E-35    |
| ppa010418m PACid:17660154 | -3.891191909 | 1.86E-33  | 9.69E-32    |
| ppa015791m PACid:17652739 | -3.881854045 | 1.34E-07  | 1.82E-06    |
| ppa009312m PACid:17646620 | -3.881579507 | 9.75E-11  | 1.83E-09    |
| ppa010114m PACid:17648503 | -3.816089732 | 1.92E-25  | 7.93E-24    |
| ppa003791m PACid:17666679 | -3.721043599 | 2.85E-12  | 5.97E-11    |
| ppa025027m PACid:17650388 | -3.68242831  | 1.54E-06  | 1.79E-05    |
| ppa026846m PACid:17646873 | -3.628886457 | 2.82E-06  | 3.11E-05    |
| ppa001278m PACid:17667715 | -3.554339272 | 1.04E-10  | 1.96E-09    |
| ppa020189m PACid:17669074 | -3.527646985 | 4.11E-08  | 5.95E-07    |
| ppa012188m PACid:17654558 | -3.51340924  | 9.38E-06  | 9.63E-05    |
| ppa011103m PACid:17644289 | -3.479845795 | 4.10E-41  | 2.62E-39    |
| ppa001083m PACid:17661334 | -3.450945153 | 1.70E-05  | 0.00016691  |
| ppa017425m PACid:17649190 | -3.450945153 | 1.70E-05  | 0.000166775 |
| ppa026370m PACid:17643207 | -3.450945153 | 1.70E-05  | 0.00016664  |

---

---

|                           |              |             |             |
|---------------------------|--------------|-------------|-------------|
| ppa004191m PACid:17661889 | -3.450945153 | 1.70E-05    | 0.000166505 |
| ppa011670m PACid:17653139 | -3.426689389 | 2.74E-87    | 4.67E-85    |
| ppa023839m PACid:17658113 | -3.416255477 | 8.37E-14    | 1.96E-12    |
| ppa016764m PACid:17665366 | -3.375039431 | 2.39E-15    | 6.22E-14    |
| ppa017311m PACid:17656555 | -3.328153326 | 8.73E-13    | 1.90E-11    |
| ppa020227m PACid:17655902 | -3.319599289 | 5.58E-05    | 0.000490527 |
| ppa026375m PACid:17660441 | -3.250374834 | 0.000100494 | 0.00083197  |
| ppa003606m PACid:17662014 | -3.250374834 | 0.000100494 | 0.0008314   |
| ppa016489m PACid:17645649 | -3.22490364  | 3.77E-08    | 5.47E-07    |
| ppa025916m PACid:17643357 | -3.216218654 | 2.54E-06    | 2.83E-05    |
| ppa012644m PACid:17642088 | -3.216218654 | 2.54E-06    | 2.83E-05    |
| ppa018401m PACid:17659385 | -3.180512396 | 2.04E-39    | 1.25E-37    |
| ppa019623m PACid:17656091 | -3.161333853 | 5.59E-29    | 2.61E-27    |
| ppa011161m PACid:17653520 | -3.115954852 | 3.51E-77    | 5.05E-75    |
| ppa004584m PACid:17667862 | -3.108694436 | 2.12E-07    | 2.81E-06    |
| ppa015105m PACid:17666420 | -3.09647947  | 1.46E-54    | 1.26E-52    |
| ppa018811m PACid:17658697 | -3.026152288 | 6.64E-07    | 8.26E-06    |
| ppa006443m PACid:17651269 | -3.023207391 | 8.68E-10    | 1.50E-08    |
| ppa008698m PACid:17658085 | -3.02101929  | 1.20E-12    | 2.57E-11    |
| ppa025759m PACid:17664483 | -3.010492374 | 4.54E-57    | 4.16E-55    |
| ppa008035m PACid:17646541 | -3.009984089 | 4.26E-11    | 8.22E-10    |
| ppa008996m PACid:17661578 | -2.998278201 | 8.43E-25    | 3.40E-23    |
| ppa013543m PACid:17656915 | -2.972811989 | 5.55E-08    | 7.93E-07    |
| ppa005454m PACid:17646757 | -2.94873133  | 2.05E-18    | 6.33E-17    |
| ppa012940m PACid:17648106 | -2.921078845 | 2.74E-110   | 7.05E-108   |
| ppa004343m PACid:17655679 | -2.918708384 | 4.89E-14    | 1.17E-12    |
| ppa004760m PACid:17660630 | -2.911167555 | 1.97E-11    | 3.91E-10    |
| ppa005525m PACid:17661365 | -2.908670602 | 4.00E-10    | 7.14E-09    |
| ppa022359m PACid:17646410 | -2.884326044 | 6.06E-71    | 7.72E-69    |
| ppa005226m PACid:17650776 | -2.883254798 | 3.95E-44    | 2.68E-42    |
| ppa022793m PACid:17662739 | -2.881579507 | 7.84E-05    | 0.000669324 |
| ppa013714m PACid:17658930 | -2.848704223 | 0           | 0           |
| ppa023694m PACid:17659862 | -2.842571195 | 1.96E-15    | 5.11E-14    |
| ppa003852m PACid:17640746 | -2.842571195 | 2.49E-08    | 3.74E-07    |
| ppa004220m PACid:17645835 | -2.834457066 | 3.89E-14    | 9.38E-13    |
| ppa002995m PACid:17662532 | -2.77695757  | 7.49E-08    | 1.05E-06    |
| ppa007015m PACid:17653200 | -2.770633307 | 6.33E-09    | 9.96E-08    |
| ppa014424m PACid:17668189 | -2.764570056 | 3.99E-12    | 8.27E-11    |
| ppa021292m PACid:17643557 | -2.752836987 | 8.48E-25    | 3.40E-23    |
| ppa014874m PACid:17662082 | -2.747483466 | 1.90E-05    | 0.000183515 |
| ppa008524m PACid:17665430 | -2.743421231 | 2.69E-19    | 8.57E-18    |
| ppa012578m PACid:17647690 | -2.735517379 | 0           | 0           |
| ppa012410m PACid:17648372 | -2.708217069 | 1.19E-19    | 3.88E-18    |
| ppa010554m PACid:17652465 | -2.674976167 | 4.03E-10    | 7.17E-09    |

---

---

|                           |              |            |             |
|---------------------------|--------------|------------|-------------|
| ppb008343m PACid:17645990 | -2.674976167 | 4.03E-10   | 7.16E-09    |
| ppa004546m PACid:17640549 | -2.659509454 | 4.61E-06   | 4.95E-05    |
| ppa018853m PACid:17646870 | -2.659509454 | 4.61E-06   | 4.94E-05    |
| ppa012753m PACid:17643104 | -2.641916244 | 1.82E-133  | 6.11E-131   |
| ppa022820m PACid:17642063 | -2.583006304 | 9.69E-05   | 0.000805177 |
| ppa012021m PACid:17648268 | -2.560053926 | 1.91E-06   | 2.19E-05    |
| ppa023197m PACid:17666791 | -2.551409941 | 5.29E-15   | 1.34E-13    |
| ppa003209m PACid:17646815 | -2.549815938 | 5.77E-09   | 9.13E-08    |
| ppa024024m PACid:17651754 | -2.519959719 | 4.57E-12   | 9.42E-11    |
| ppa015987m PACid:17667288 | -2.51982748  | 3.25E-06   | 3.56E-05    |
| ppa024020m PACid:17662450 | -2.51982748  | 3.25E-06   | 3.56E-05    |
| ppa009719m PACid:17642916 | -2.506705037 | 3.78E-15   | 9.68E-14    |
| ppa011784m PACid:17655762 | -2.476737244 | 5.94E-10   | 1.04E-08    |
| ppa003501m PACid:17653527 | -2.472994069 | 3.89E-05   | 0.000355984 |
| ppa003769m PACid:17667166 | -2.472994069 | 4.79E-13   | 1.08E-11    |
| ppa001524m PACid:17651971 | -2.470180755 | 1.08E-34   | 5.82E-33    |
| ppa013716m PACid:17668576 | -2.468672412 | 4.46E-23   | 1.67E-21    |
| ppa007762m PACid:17664645 | -2.456774232 | 1.91E-07   | 2.53E-06    |
| ppa003271m PACid:17648917 | -2.448460501 | 1.32E-06   | 1.56E-05    |
| ppa008656m PACid:17653704 | -2.448317469 | 6.79E-09   | 1.06E-07    |
| ppa020862m PACid:17641430 | -2.441867766 | 1.12E-15   | 2.97E-14    |
| ppa010358m PACid:17655665 | -2.435386145 | 2.81E-16   | 7.69E-15    |
| ppa003028m PACid:17650848 | -2.423211431 | 6.56E-05   | 0.000572099 |
| ppa002707m PACid:17642130 | -2.412108168 | 5.58E-13   | 1.25E-11    |
| ppa013347m PACid:17647825 | -2.411778643 | 7.79E-08   | 1.09E-06    |
| ppa009792m PACid:17647534 | -2.408769878 | 7.20E-142  | 2.56E-139   |
| ppa014227m PACid:17642215 | -2.405049345 | 3.74E-12   | 7.78E-11    |
| ppa013580m PACid:17665261 | -2.404107074 | 9.65E-66   | 1.06E-63    |
| ppa001456m PACid:17652505 | -2.401108186 | 7.35E-18   | 2.23E-16    |
| ppa004728m PACid:17662802 | -2.396074987 | 9.29E-13   | 2.02E-11    |
| ppa017780m PACid:17648009 | -2.394914534 | 1.55E-05   | 0.000153138 |
| ppa015981m PACid:17651437 | -2.394914534 | 1.55E-05   | 0.000153013 |
| ppa005153m PACid:17663226 | -2.394914534 | 1.55E-05   | 0.000152889 |
| ppa001593m PACid:17659510 | -2.39358908  | 2.51E-11   | 4.94E-10    |
| ppa006159m PACid:17658937 | -2.38389817  | 1.69E-10   | 3.14E-09    |
| ppa005873m PACid:17653466 | -2.374395515 | 3.72E-06   | 4.06E-05    |
| ppa009014m PACid:17658559 | -2.374395515 | 3.72E-06   | 4.06E-05    |
| ppa003325m PACid:17665947 | -2.36983808  | 0.00011028 | 0.000906775 |
| ppa012424m PACid:17664591 | -2.363768829 | 2.81E-10   | 5.12E-09    |
| ppa011926m PACid:17653795 | -2.3593155   | 2.56E-31   | 1.27E-29    |
| ppa005820m PACid:17650912 | -2.356551491 | 1.12E-77   | 1.63E-75    |
| ppa000847m PACid:17652982 | -2.353610171 | 4.48E-27   | 1.96E-25    |
| ppa007718m PACid:17658499 | -2.351261589 | 2.60E-05   | 0.00024367  |
| ppa008211m PACid:17667660 | -2.350752073 | 1.58E-13   | 3.66E-12    |

---

---

|                           |              |             |             |
|---------------------------|--------------|-------------|-------------|
| ppa010226m PACid:17648802 | -2.304668895 | 4.33E-05    | 0.000394322 |
| ppa001929m PACid:17667125 | -2.294815146 | 2.38E-30    | 1.15E-28    |
| ppa012676m PACid:17659347 | -2.290516022 | 0           | 0           |
| ppa015531m PACid:17667384 | -2.285802388 | 1.80E-14    | 4.43E-13    |
| ppa020272m PACid:17648626 | -2.272339179 | 4.78E-13    | 1.08E-11    |
| ppa014549m PACid:17666569 | -2.269498535 | 6.65E-107   | 1.64E-104   |
| ppa003386m PACid:17644768 | -2.258734268 | 2.38E-07    | 3.13E-06    |
| ppa000410m PACid:17655991 | -2.257589561 | 1.16E-29    | 5.50E-28    |
| ppa007361m PACid:17656180 | -2.257336872 | 1.41E-08    | 2.15E-07    |
| ppa013344m PACid:17655147 | -2.250713078 | 4.68E-24    | 1.82E-22    |
| ppa005087m PACid:17646195 | -2.240663904 | 1.92E-21    | 6.83E-20    |
| ppa005661m PACid:17648054 | -2.234420281 | 5.68E-09    | 9.03E-08    |
| ppa011939m PACid:17665722 | -2.234420281 | 5.68E-09    | 9.02E-08    |
| ppa023229m PACid:17655442 | -2.226256001 | 2.10E-12    | 4.44E-11    |
| ppa006330m PACid:17665504 | -2.223678987 | 2.43E-123   | 7.94E-121   |
| ppa009549m PACid:17645131 | -2.219713321 | 5.62E-10    | 9.85E-09    |
| ppa023730m PACid:17655479 | -2.219050914 | 6.71E-06    | 7.00E-05    |
| ppa003428m PACid:17655256 | -2.213779291 | 2.81E-05    | 0.000262125 |
| ppa011379m PACid:17660395 | -2.208399149 | 2.11E-18    | 6.48E-17    |
| ppa003062m PACid:17659603 | -2.208399149 | 0.000118637 | 0.000967585 |
| ppa008461m PACid:17662557 | -2.2049606   | 1.56E-07    | 2.09E-06    |
| ppa002982m PACid:17666251 | -2.200139614 | 9.17E-10    | 1.58E-08    |
| ppa000591m PACid:17643219 | -2.194596864 | 2.65E-06    | 2.93E-05    |
| ppa012777m PACid:17654106 | -2.189769813 | 1.44E-46    | 1.05E-44    |
| ppa002188m PACid:17644676 | -2.183722549 | 6.20E-08    | 8.80E-07    |
| ppa010637m PACid:17648068 | -2.180915785 | 1.10E-05    | 0.000111592 |
| ppa012300m PACid:17666491 | -2.177000519 | 2.54E-07    | 3.34E-06    |
| ppa008109m PACid:17647324 | -2.1652555   | 1.89E-32    | 9.54E-31    |
| ppa011941m PACid:17645010 | -2.16142204  | 4.76E-93    | 9.27E-91    |
| ppa016442m PACid:17666463 | -2.158253145 | 1.78E-28    | 8.22E-27    |
| ppa007560m PACid:17644482 | -2.148967689 | 5.94E-13    | 1.32E-11    |
| ppa025725m PACid:17661109 | -2.14599155  | 3.89E-18    | 1.18E-16    |
| ppa007995m PACid:17641249 | -2.127755547 | 7.53E-05    | 0.00064704  |
| ppa003709m PACid:17658219 | -2.126018526 | 1.57E-09    | 2.66E-08    |
| ppa011991m PACid:17668665 | -2.125856363 | 7.04E-06    | 7.32E-05    |
| ppb012922m PACid:17647443 | -2.10524316  | 2.65E-07    | 3.48E-06    |
| ppa014457m PACid:17645486 | -2.102841709 | 2.92E-05    | 0.000272585 |
| ppa011194m PACid:17666926 | -2.102841709 | 2.92E-05    | 0.000272375 |
| ppa003520m PACid:17664217 | -2.097818551 | 4.53E-21    | 1.57E-19    |
| ppa022289m PACid:17666575 | -2.091712314 | 1.09E-06    | 1.30E-05    |
| ppa021072m PACid:17660640 | -2.089605837 | 1.14E-05    | 0.000115268 |
| ppa010520m PACid:17667772 | -2.087519606 | 2.85E-48    | 2.18E-46    |
| ppa003844m PACid:17665673 | -2.08591276  | 4.09E-09    | 6.60E-08    |
| ppa008292m PACid:17657649 | -2.078720602 | 4.28E-07    | 5.46E-06    |

---

---

|                            |              |           |             |
|----------------------------|--------------|-----------|-------------|
| ppa013120m PACid:17650896  | -2.074176224 | 4.46E-06  | 4.83E-05    |
| ppa016926m PACid:17658682  | -2.067645583 | 1.69E-07  | 2.26E-06    |
| ppa005289m PACid:17651288  | -2.062797995 | 2.84E-33  | 1.47E-31    |
| ppa002037m PACid:17653542  | -2.061784692 | 6.97E-17  | 1.96E-15    |
| ppa012981m PACid:17663566  | -2.05367598  | 1.84E-05  | 0.000178805 |
| ppa005183m PACid:17650541  | -2.044841675 | 4.15E-10  | 7.35E-09    |
| ppa007670m PACid:17658298  | -2.038039361 | 4.18E-09  | 6.75E-08    |
| ppa022938m PACid:17655792  | -2.023942685 | 1.68E-08  | 2.55E-07    |
| ppa013792m PACid:17645657  | -2.01344212  | 1.23E-145 | 4.78E-143   |
| ppa011666m PACid:17640794  | -2.009202849 | 1.06E-09  | 1.81E-08    |
| ppa022572m PACid:17662640  | -2.002193102 | 2.69E-08  | 4.01E-07    |
| ppa003447m PACid:17645647  | -2.000531869 | 6.69E-11  | 1.27E-09    |
| ppa003405m PACid:17646705  | -2           | 4.51E-06  | 4.85E-05    |
| ppa012290m PACid:17652096  | -1.994139349 | 1.77E-06  | 2.04E-05    |
| ppa002576m PACid:17640432  | -1.989166194 | 6.94E-07  | 8.61E-06    |
| ppa013612m PACid:17648145  | -1.989166194 | 6.94E-07  | 8.60E-06    |
| ppa024858m PACid:17661535  | -1.97769322  | 4.74E-05  | 0.000424269 |
| ppa013098m PACid:17644157  | -1.975958169 | 1.08E-12  | 2.34E-11    |
| ppa006781m PACid:17660697  | -1.972811989 | 1.84E-05  | 0.000178752 |
| ppa011825m PACid:17640577  | -1.972661291 | 2.67E-09  | 4.38E-08    |
| ppa007003m PACid:17656824  | -1.965472317 | 2.81E-06  | 3.11E-05    |
| ppb004684m PACid:17656904  | -1.965472317 | 2.81E-06  | 3.11E-05    |
| ppa004143m PACid:17650952  | -1.960464165 | 6.21E-37  | 3.62E-35    |
| ppa016008m PACid:17657804  | -1.959789573 | 4.41E-14  | 1.06E-12    |
| ppa006974m PACid:17648419  | -1.959190785 | 6.78E-08  | 9.57E-07    |
| ppa023716m PACid:17640322  | -1.9557261   | 4.85E-31  | 2.39E-29    |
| ppa012344m PACid:17665337  | -1.946936649 | 4.15E-27  | 1.82E-25    |
| ppa001969m PACid:17653225  | -1.943191764 | 2.13E-21  | 7.53E-20    |
| ppa000186m PACid:17658925  | -1.937466775 | 7.56E-05  | 0.000647964 |
| ppa005225m PACid:17648154  | -1.935204877 | 4.47E-06  | 4.83E-05    |
| ppa010667m PACid:17652306  | -1.935204877 | 4.47E-06  | 4.83E-05    |
| ppa004603m PACid:17642304  | -1.922984572 | 6.70E-12  | 1.37E-10    |
| ppa002817m PACid:17666720  | -1.914213936 | 6.69E-08  | 9.47E-07    |
| ppa017455m PACid:17668032  | -1.91409095  | 1.69E-07  | 2.26E-06    |
| ppa011592m PACid:17649337  | -1.908670602 | 1.09E-06  | 1.30E-05    |
| ppa001807m PACid:17666087  | -1.904310838 | 4.14E-10  | 7.35E-09    |
| ppa1027217m PACid:17660585 | -1.903197567 | 1.81E-05  | 0.000175727 |
| ppa009596m PACid:17663788  | -1.901911582 | 8.27E-34  | 4.40E-32    |
| ppa013527m PACid:17666226  | -1.900631605 | 4.65E-05  | 0.000416327 |
| ppa007297m PACid:17648516  | -1.898477215 | 1.94E-19  | 6.25E-18    |
| ppa011225m PACid:17641971  | -1.886029236 | 1.63E-09  | 2.75E-08    |
| ppa004508m PACid:17657917  | -1.870302487 | 1.13E-17  | 3.33E-16    |
| ppa003309m PACid:17657179  | -1.869344742 | 1.69E-100 | 3.93E-98    |
| ppa013260m PACid:17654661  | -1.867991475 | 7.70E-21  | 2.61E-19    |

---



---

|                           |              |            |             |
|---------------------------|--------------|------------|-------------|
| ppa006630m PACid:17648614 | -1.862496476 | 7.33E-05   | 0.000631453 |
| ppa006865m PACid:17642694 | -1.861763086 | 3.83E-28   | 1.73E-26    |
| ppa005513m PACid:17641943 | -1.860773423 | 4.70E-45   | 3.28E-43    |
| ppa011364m PACid:17662916 | -1.858982287 | 1.01E-11   | 2.03E-10    |
| ppa022417m PACid:17661696 | -1.849395351 | 6.84E-06   | 7.13E-05    |
| ppa021176m PACid:17650413 | -1.848455706 | 2.58E-07   | 3.39E-06    |
| ppa013450m PACid:17659501 | -1.848455706 | 2.58E-07   | 3.39E-06    |
| ppa002905m PACid:17647247 | -1.843274496 | 6.53E-07   | 8.13E-06    |
| ppa007935m PACid:17661463 | -1.834457066 | 4.48E-05   | 0.000401899 |
| ppa005474m PACid:17655860 | -1.826111785 | 4.03E-07   | 5.16E-06    |
| ppa006408m PACid:17654570 | -1.826111785 | 4.03E-07   | 5.16E-06    |
| ppa006678m PACid:17660248 | -1.824648846 | 0.00011508 | 0.000941752 |
| ppa002973m PACid:17658619 | -1.824648846 | 0.00011508 | 0.000941114 |
| ppa015633m PACid:17647175 | -1.82247448  | 1.51E-12   | 3.23E-11    |
| ppa013471m PACid:17661141 | -1.818756737 | 1.17E-84   | 1.96E-82    |
| ppa024429m PACid:17659031 | -1.79970135  | 6.55E-06   | 6.84E-05    |
| ppa013004m PACid:17646770 | -1.797210036 | 9.17E-15   | 2.28E-13    |
| ppa024173m PACid:17663790 | -1.793184022 | 2.26E-13   | 5.16E-12    |
| ppa008712m PACid:17656764 | -1.790586709 | 6.67E-25   | 2.70E-23    |
| ppa004060m PACid:17648282 | -1.781956979 | 2.23E-16   | 6.15E-15    |
| ppa010706m PACid:17668387 | -1.780928063 | 6.23E-24   | 2.40E-22    |
| ppa013173m PACid:17644641 | -1.77770269  | 2.17E-14   | 5.32E-13    |
| ppa008318m PACid:17664157 | -1.768587573 | 6.16E-27   | 2.68E-25    |
| ppa005278m PACid:17662214 | -1.766656316 | 8.64E-10   | 1.50E-08    |
| ppa016382m PACid:17659484 | -1.766656316 | 8.64E-10   | 1.49E-08    |
| ppa013222m PACid:17652268 | -1.764765351 | 2.95E-98   | 6.37E-96    |
| ppa003941m PACid:17656295 | -1.756728849 | 3.28E-11   | 6.39E-10    |
| ppa013426m PACid:17643234 | -1.749978131 | 3.29E-10   | 5.92E-09    |
| ppa025989m PACid:17655273 | -1.741966275 | 1.57E-05   | 0.000154385 |
| ppa010800m PACid:17644802 | -1.733840461 | 1.37E-07   | 1.86E-06    |
| ppa018866m PACid:17642245 | -1.733840461 | 1.37E-07   | 1.85E-06    |
| ppb010244m PACid:17667542 | -1.73306114  | 7.42E-14   | 1.75E-12    |
| ppa013305m PACid:17655745 | -1.731448589 | 2.31E-06   | 2.61E-05    |
| ppa006431m PACid:17660508 | -1.724067367 | 1.91E-10   | 3.53E-09    |
| ppa000104m PACid:17664785 | -1.713879285 | 1.91E-09   | 3.21E-08    |
| ppa007832m PACid:17645388 | -1.710283552 | 2.91E-10   | 5.29E-09    |
| ppa002045m PACid:17653156 | -1.709877767 | 8.59E-07   | 1.05E-05    |
| ppb023648m PACid:17651305 | -1.702818728 | 6.06E-19   | 1.92E-17    |
| ppa000687m PACid:17666037 | -1.697776329 | 7.84E-08   | 1.10E-06    |
| ppa004537m PACid:17646997 | -1.693734694 | 3.20E-07   | 4.13E-06    |
| ppa004042m PACid:17652434 | -1.690205661 | 4.80E-08   | 6.91E-07    |
| ppa001941m PACid:17666152 | -1.68993206  | 2.46E-13   | 5.58E-12    |
| ppa005617m PACid:17664214 | -1.68968165  | 5.03E-37   | 2.95E-35    |
| ppa008401m PACid:17665391 | -1.676152843 | 3.99E-74   | 5.30E-72    |

---

---

|                           |              |           |             |
|---------------------------|--------------|-----------|-------------|
| ppa026720m PACid:17641519 | -1.654771967 | 3.40E-12  | 7.09E-11    |
| ppa011177m PACid:17647931 | -1.650283549 | 1.24E-174 | 5.76E-172   |
| ppa016719m PACid:17642109 | -1.650253961 | 5.67E-05  | 0.000497273 |
| ppa012415m PACid:17661286 | -1.646747193 | 4.51E-07  | 5.73E-06    |
| ppa005393m PACid:17645759 | -1.646747193 | 4.51E-07  | 5.72E-06    |
| ppa007393m PACid:17645810 | -1.645104736 | 3.42E-05  | 0.000315126 |
| ppb013010m PACid:17669289 | -1.640801102 | 2.71E-15  | 7.00E-14    |
| ppa005302m PACid:17641883 | -1.640771116 | 2.34E-09  | 3.89E-08    |
| ppa005542m PACid:17643009 | -1.636301198 | 1.26E-11  | 2.54E-10    |
| ppa011819m PACid:17646328 | -1.630619892 | 3.71E-29  | 1.74E-27    |
| ppa014016m PACid:17649797 | -1.628489876 | 5.76E-09  | 9.13E-08    |
| ppa000094m PACid:17663888 | -1.626215133 | 6.82E-07  | 8.46E-06    |
| ppa008528m PACid:17645732 | -1.623436649 | 7.58E-06  | 7.88E-05    |
| ppa000120m PACid:17646271 | -1.623436649 | 7.58E-06  | 7.87E-05    |
| ppa011167m PACid:17648743 | -1.623269557 | 6.69E-23  | 2.49E-21    |
| ppa013661m PACid:17647188 | -1.618024521 | 4.71E-58  | 4.45E-56    |
| ppa018565m PACid:17663039 | -1.617701117 | 1.04E-21  | 3.76E-20    |
| ppa011297m PACid:17668585 | -1.614837296 | 5.19E-05  | 0.00046057  |
| ppa004188m PACid:17642110 | -1.614837296 | 5.19E-05  | 0.000460232 |
| ppa011808m PACid:17642082 | -1.611901573 | 5.30E-09  | 8.47E-08    |
| ppa025434m PACid:17653233 | -1.603201619 | 1.89E-05  | 0.000183082 |
| ppa017535m PACid:17644582 | -1.603201619 | 1.89E-05  | 0.000182936 |
| ppa021082m PACid:17658469 | -1.598760048 | 1.14E-05  | 0.000115539 |
| ppa003719m PACid:17646583 | -1.593952798 | 1.06E-16  | 2.94E-15    |
| ppa018041m PACid:17648846 | -1.593083461 | 2.20E-55  | 1.96E-53    |
| ppb019987m PACid:17662744 | -1.592038018 | 2.97E-09  | 4.86E-08    |
| ppa006306m PACid:17660572 | -1.589520783 | 3.90E-11  | 7.59E-10    |
| ppa002999m PACid:17642517 | -1.584962501 | 7.84E-05  | 0.000669248 |
| ppa011176m PACid:17667021 | -1.584962501 | 7.84E-05  | 0.000668775 |
| ppa012001m PACid:17655514 | -1.555302832 | 2.27E-35  | 1.24E-33    |
| ppa012769m PACid:17668256 | -1.555122281 | 1.17E-07  | 1.60E-06    |
| ppa004540m PACid:17663706 | -1.555122281 | 1.17E-07  | 1.60E-06    |
| ppa012153m PACid:17651488 | -1.547214143 | 2.58E-05  | 0.000242415 |
| ppa002969m PACid:17660420 | -1.541585438 | 2.10E-06  | 2.39E-05    |
| ppa009639m PACid:17650220 | -1.540594789 | 6.87E-217 | 3.95E-214   |
| ppa023832m PACid:17652091 | -1.533969709 | 1.24E-09  | 2.12E-08    |
| ppa006244m PACid:17654150 | -1.527573828 | 1.07E-17  | 3.18E-16    |
| ppa011280m PACid:17658150 | -1.524439129 | 8.01E-118 | 2.30E-115   |
| ppa012480m PACid:17649977 | -1.521652198 | 3.55E-08  | 5.19E-07    |
| ppa013223m PACid:17661976 | -1.520927233 | 1.74E-59  | 1.70E-57    |
| ppa004542m PACid:17646649 | -1.520761248 | 2.26E-18  | 6.95E-17    |
| ppa017910m PACid:17657395 | -1.515164761 | 1.11E-19  | 3.62E-18    |
| ppb001660m PACid:17644700 | -1.504208009 | 2.33E-07  | 3.07E-06    |
| ppa005890m PACid:17653764 | -1.498428453 | 1.26E-05  | 0.000126061 |

---

---

|                           |              |           |             |
|---------------------------|--------------|-----------|-------------|
| ppa013737m PACid:17652924 | -1.495599044 | 4.00E-09  | 6.51E-08    |
| ppa012231m PACid:17669102 | -1.494666575 | 3.34E-57  | 3.10E-55    |
| ppa025855m PACid:17651626 | -1.492097808 | 9.50E-05  | 0.000791255 |
| ppa003877m PACid:17667033 | -1.490274416 | 1.27E-07  | 1.73E-06    |
| ppa010072m PACid:17666074 | -1.477753257 | 3.40E-50  | 2.72E-48    |
| ppa007105m PACid:17648564 | -1.475569019 | 1.14E-07  | 1.57E-06    |
| ppa027208m PACid:17648540 | -1.471433555 | 3.07E-07  | 3.99E-06    |
| ppa000698m PACid:17661207 | -1.46880125  | 5.11E-05  | 0.00045364  |
| ppa015407m PACid:17662915 | -1.466978428 | 1.37E-06  | 1.61E-05    |
| ppa004027m PACid:17653607 | -1.46579802  | 8.47E-05  | 0.000718487 |
| ppa011393m PACid:17641491 | -1.463383818 | 2.20E-229 | 1.47E-226   |
| ppa008063m PACid:17660580 | -1.454393323 | 1.66E-05  | 0.0001629   |
| ppa012954m PACid:17669077 | -1.452564681 | 2.73E-43  | 1.83E-41    |
| ppb023427m PACid:17642344 | -1.448498607 | 1.71E-15  | 4.48E-14    |
| ppa000114m PACid:17657476 | -1.441867766 | 7.53E-05  | 0.000647083 |
| ppa022581m PACid:17657666 | -1.441223608 | 1.55E-17  | 4.53E-16    |
| ppa013500m PACid:17651996 | -1.438005061 | 8.95E-06  | 9.22E-05    |
| ppa003417m PACid:17647472 | -1.435999862 | 6.16E-09  | 9.71E-08    |
| ppa011792m PACid:17668531 | -1.434430034 | 3.65E-17  | 1.05E-15    |
| ppa011284m PACid:17667864 | -1.431991246 | 6.16E-82  | 9.80E-80    |
| ppa009332m PACid:17665631 | -1.427794632 | 6.88E-77  | 9.79E-75    |
| ppa013939m PACid:17653268 | -1.426324136 | 3.05E-21  | 1.06E-19    |
| ppa019192m PACid:17657896 | -1.420640206 | 7.95E-06  | 8.23E-05    |
| ppa008201m PACid:17653320 | -1.41223689  | 2.16E-05  | 0.000206352 |
| ppa026106m PACid:17644929 | -1.41223689  | 2.16E-05  | 0.000206189 |
| ppa007604m PACid:17655140 | -1.412184096 | 3.71E-15  | 9.51E-14    |
| ppa005590m PACid:17651297 | -1.411583282 | 2.73E-45  | 1.93E-43    |
| ppa010223m PACid:17641541 | -1.407160687 | 1.23E-82  | 2.01E-80    |
| ppa013469m PACid:17668624 | -1.405329946 | 1.82E-10  | 3.37E-09    |
| ppa010167m PACid:17663484 | -1.381846974 | 6.06E-13  | 1.34E-11    |
| ppa007255m PACid:17644606 | -1.371934461 | 7.76E-42  | 5.04E-40    |
| ppa002536m PACid:17661766 | -1.366408538 | 4.57E-05  | 0.000409455 |
| ppa003262m PACid:17650664 | -1.351448938 | 1.30E-05  | 0.000129866 |
| ppa026813m PACid:17659943 | -1.351028458 | 2.04E-10  | 3.77E-09    |
| ppa013050m PACid:17663148 | -1.347239183 | 2.70E-08  | 4.02E-07    |
| ppa003802m PACid:17664861 | -1.340167213 | 2.63E-09  | 4.32E-08    |
| ppa008491m PACid:17668236 | -1.33909216  | 2.38E-08  | 3.57E-07    |
| ppa011898m PACid:17666678 | -1.337210012 | 2.31E-25  | 9.42E-24    |
| ppa012754m PACid:17640801 | -1.334692189 | 2.17E-50  | 1.76E-48    |
| ppa024854m PACid:17643685 | -1.326704891 | 3.40E-08  | 5.00E-07    |
| ppa023263m PACid:17650445 | -1.326704891 | 3.40E-08  | 4.99E-07    |
| ppa014463m PACid:17643699 | -1.320367581 | 9.41E-07  | 1.14E-05    |
| ppa010755m PACid:17647934 | -1.312400254 | 7.26E-32  | 3.62E-30    |
| ppa012790m PACid:17662237 | -1.310454224 | 5.01E-14  | 1.19E-12    |

---

---

|                           |              |             |             |
|---------------------------|--------------|-------------|-------------|
| ppa007608m PACid:17660560 | -1.306352289 | 1.43E-05    | 0.000141893 |
| ppa013445m PACid:17651358 | -1.306338911 | 2.23E-66    | 2.50E-64    |
| ppb015588m PACid:17669011 | -1.29712046  | 1.08E-08    | 1.68E-07    |
| ppa009369m PACid:17653310 | -1.295715875 | 1.64E-18    | 5.10E-17    |
| ppa001230m PACid:17642722 | -1.295167027 | 1.25E-05    | 0.000125201 |
| ppa009169m PACid:17646352 | -1.294815146 | 6.04E-08    | 8.59E-07    |
| ppa001169m PACid:17646296 | -1.290677161 | 2.11E-22    | 7.77E-21    |
| ppa012984m PACid:17660219 | -1.288438766 | 4.38E-82    | 7.06E-80    |
| ppa020389m PACid:17662447 | -1.286152068 | 5.51E-07    | 6.93E-06    |
| ppa011733m PACid:17642487 | -1.284997876 | 1.09E-14    | 2.69E-13    |
| ppa014312m PACid:17668747 | -1.284387361 | 5.93E-15    | 1.49E-13    |
| ppa003828m PACid:17648549 | -1.284274189 | 5.82E-06    | 6.15E-05    |
| ppa006898m PACid:17667208 | -1.281598011 | 0.000118605 | 0.000967979 |
| ppa005333m PACid:17654348 | -1.276617378 | 1.78E-05    | 0.000173687 |
| ppa006523m PACid:17651815 | -1.276038131 | 1.05E-18    | 3.29E-17    |
| ppa012018m PACid:17651778 | -1.274916029 | 5.08E-06    | 5.40E-05    |
| ppa012321m PACid:17644906 | -1.268947736 | 0.000103054 | 0.000850831 |
| ppa009209m PACid:17645568 | -1.268947736 | 0.000103054 | 0.00085025  |
| ppa012943m PACid:17640751 | -1.268946803 | 5.47E-05    | 0.000482059 |
| ppa008800m PACid:17666840 | -1.267531748 | 1.17E-57    | 1.10E-55    |
| ppa010552m PACid:17664768 | -1.266194747 | 2.37E-06    | 2.67E-05    |
| ppa026365m PACid:17664884 | -1.266194747 | 2.37E-06    | 2.67E-05    |
| ppa000447m PACid:17669265 | -1.262505559 | 2.61E-09    | 4.29E-08    |
| ppa000464m PACid:17654385 | -1.258976189 | 8.95E-05    | 0.00074825  |
| ppa001285m PACid:17643754 | -1.258515867 | 1.35E-05    | 0.000134227 |
| ppa003623m PACid:17655180 | -1.258010506 | 4.75E-05    | 0.000424584 |
| ppa001064m PACid:17645439 | -1.257563725 | 1.10E-06    | 1.32E-05    |
| ppa011974m PACid:17659537 | -1.254520191 | 1.27E-12    | 2.72E-11    |
| ppa004887m PACid:17666330 | -1.249119659 | 2.19E-05    | 0.000209327 |
| ppa012068m PACid:17668884 | -1.249119659 | 2.19E-05    | 0.000209162 |
| ppa012040m PACid:17645392 | -1.247624967 | 3.07E-16    | 8.39E-15    |
| ppa007818m PACid:17651655 | -1.240955152 | 1.02E-05    | 0.000104167 |
| ppa004422m PACid:17663012 | -1.240955152 | 1.02E-05    | 0.000104079 |
| ppa005083m PACid:17668625 | -1.239629374 | 1.31E-09    | 2.23E-08    |
| ppa009033m PACid:17656433 | -1.23786383  | 7.27E-07    | 8.98E-06    |
| ppa005536m PACid:17669156 | -1.236887215 | 6.72E-05    | 0.000583315 |
| ppa012294m PACid:17659439 | -1.234213286 | 8.65E-28    | 3.84E-26    |
| ppa023464m PACid:17640779 | -1.231790141 | 2.81E-29    | 1.32E-27    |
| ppa006618m PACid:17654435 | -1.222820283 | 6.83E-17    | 1.92E-15    |
| ppa022557m PACid:17666541 | -1.221740061 | 1.90E-06    | 2.18E-05    |
| ppa001464m PACid:17648541 | -1.213832948 | 4.13E-07    | 5.28E-06    |
| ppa000095m PACid:17647200 | -1.211126387 | 4.36E-05    | 0.000395368 |
| ppa006390m PACid:17667419 | -1.210912963 | 5.66E-21    | 1.95E-19    |
| ppa012075m PACid:17661699 | -1.210697464 | 6.64E-09    | 1.04E-07    |

---

---

|                           |              |           |             |
|---------------------------|--------------|-----------|-------------|
| ppa010234m PACid:17655357 | -1.206175528 | 1.67E-07  | 2.24E-06    |
| ppa010610m PACid:17668774 | -1.202691993 | 1.16E-36  | 6.67E-35    |
| ppa009300m PACid:17656541 | -1.199226437 | 6.77E-08  | 9.58E-07    |
| ppa013537m PACid:17662155 | -1.190135897 | 1.53E-09  | 2.60E-08    |
| ppa003836m PACid:17656446 | -1.188017069 | 3.00E-101 | 7.25E-99    |
| ppa010645m PACid:17645748 | -1.181391884 | 1.45E-11  | 2.90E-10    |
| ppa013861m PACid:17646890 | -1.180328666 | 3.36E-16  | 9.12E-15    |
| ppa005220m PACid:17662951 | -1.174186242 | 3.53E-10  | 6.33E-09    |
| ppa026099m PACid:17656664 | -1.173907138 | 3.40E-66  | 3.77E-64    |
| ppa000012m PACid:17653487 | -1.171888402 | 2.08E-06  | 2.37E-05    |
| ppa011911m PACid:17640898 | -1.169925001 | 1.81E-05  | 0.000175667 |
| ppa003878m PACid:17649430 | -1.167162235 | 8.35E-07  | 1.02E-05    |
| ppa005719m PACid:17645371 | -1.167162235 | 8.35E-07  | 1.02E-05    |
| ppb008326m PACid:17655951 | -1.16411938  | 3.38E-05  | 0.000311736 |
| ppa013621m PACid:17640980 | -1.160926468 | 3.65E-10  | 6.53E-09    |
| ppa008412m PACid:17651171 | -1.160397735 | 1.80E-11  | 3.57E-10    |
| ppa015669m PACid:17644565 | -1.159151606 | 2.43E-62  | 2.51E-60    |
| ppa012736m PACid:17650435 | -1.158718068 | 1.34E-06  | 1.58E-05    |
| ppa002952m PACid:17660414 | -1.158372618 | 6.33E-05  | 0.000553079 |
| ppa007663m PACid:17648450 | -1.158117395 | 6.22E-06  | 6.53E-05    |
| ppa004563m PACid:17659708 | -1.153782473 | 2.47E-11  | 4.87E-10    |
| ppa004818m PACid:17650538 | -1.152071923 | 5.45E-05  | 0.00048102  |
| ppa013510m PACid:17655432 | -1.143702177 | 3.18E-301 | 2.56E-298   |
| ppa012587m PACid:17661828 | -1.143680445 | 3.46E-07  | 4.45E-06    |
| ppa012093m PACid:17659725 | -1.140084782 | 2.99E-07  | 3.88E-06    |
| ppa024131m PACid:17646265 | -1.138386176 | 6.40E-07  | 7.98E-06    |
| ppa011378m PACid:17649715 | -1.13580949  | 2.97E-40  | 1.84E-38    |
| ppa013051m PACid:17652655 | -1.135191707 | 2.79E-80  | 4.33E-78    |
| ppa001786m PACid:17643860 | -1.134986575 | 6.38E-06  | 6.68E-05    |
| ppa004908m PACid:17658484 | -1.133995144 | 7.55E-05  | 0.000647863 |
| ppa001686m PACid:17644861 | -1.133995144 | 7.55E-05  | 0.000647403 |
| ppa000932m PACid:17650256 | -1.128359651 | 1.19E-05  | 0.000119434 |
| ppa005275m PACid:17650471 | -1.127705439 | 4.13E-11  | 7.99E-10    |
| ppa012757m PACid:17660422 | -1.126330824 | 2.57E-05  | 0.000241595 |
| ppa004431m PACid:17667682 | -1.123254568 | 5.57E-05  | 0.00049107  |
| ppa013311m PACid:17647503 | -1.120411244 | 2.96E-45  | 2.08E-43    |
| ppa006479m PACid:17650905 | -1.114403055 | 4.86E-07  | 6.14E-06    |
| ppa001730m PACid:17651686 | -1.10524316  | 7.67E-05  | 0.000657415 |
| ppa012119m PACid:17661304 | -1.103490728 | 5.21E-14  | 1.23E-12    |
| ppa004334m PACid:17660758 | -1.102980232 | 6.64E-07  | 8.25E-06    |
| ppa002793m PACid:17652246 | -1.102780474 | 4.14E-06  | 4.50E-05    |
| ppa013635m PACid:17658458 | -1.102260728 | 1.10E-13  | 2.56E-12    |
| ppa012965m PACid:17660893 | -1.101541978 | 1.61E-12  | 3.44E-11    |
| ppb021781m PACid:17649828 | -1.101209385 | 1.84E-18  | 5.70E-17    |

---

---

|                           |              |           |             |
|---------------------------|--------------|-----------|-------------|
| ppa006016m PACid:17655899 | -1.097554341 | 2.62E-10  | 4.78E-09    |
| ppa006662m PACid:17641716 | -1.096813775 | 8.83E-15  | 2.20E-13    |
| ppa013455m PACid:17647298 | -1.0932219   | 2.63E-06  | 2.93E-05    |
| ppa023976m PACid:17650999 | -1.091712314 | 1.65E-05  | 0.000162208 |
| ppa016754m PACid:17655837 | -1.086796562 | 9.05E-19  | 2.85E-17    |
| ppa003707m PACid:17649749 | -1.085654863 | 2.29E-10  | 4.19E-09    |
| ppa015170m PACid:17658294 | -1.084606873 | 3.96E-09  | 6.45E-08    |
| ppa010397m PACid:17657053 | -1.070486221 | 1.66E-05  | 0.000162884 |
| ppa010980m PACid:17644257 | -1.065661759 | 5.39E-09  | 8.59E-08    |
| ppa010028m PACid:17647481 | -1.064934898 | 3.58E-05  | 0.000328689 |
| ppa009471m PACid:17641095 | -1.064934898 | 3.58E-05  | 0.00032844  |
| ppb018874m PACid:17664579 | -1.062267044 | 5.86E-15  | 1.47E-13    |
| ppa020061m PACid:17664797 | -1.061784692 | 3.16E-07  | 4.09E-06    |
| ppa012933m PACid:17660914 | -1.05697471  | 4.05E-101 | 9.60E-99    |
| ppa000667m PACid:17664698 | -1.055015474 | 1.96E-06  | 2.23E-05    |
| ppa008582m PACid:17663444 | -1.054698729 | 5.16E-08  | 7.39E-07    |
| ppa012063m PACid:17648528 | -1.047683151 | 3.59E-06  | 3.93E-05    |
| ppa020372m PACid:17644030 | -1.04368674  | 1.40E-61  | 1.42E-59    |
| ppa011201m PACid:17656874 | -1.042840618 | 9.81E-16  | 2.61E-14    |
| ppa022781m PACid:17643273 | -1.039340892 | 6.59E-06  | 6.88E-05    |
| ppa005938m PACid:17653821 | -1.037874652 | 1.09E-07  | 1.50E-06    |
| ppa008306m PACid:17644234 | -1.035501584 | 4.85E-06  | 5.18E-05    |
| ppa012553m PACid:17653229 | -1.03360719  | 1.06E-06  | 1.27E-05    |
| ppa009288m PACid:17661086 | -1.031823318 | 5.10E-08  | 7.33E-07    |
| ppa012003m PACid:17650941 | -1.029945401 | 3.77E-08  | 5.46E-07    |
| ppa011243m PACid:17668345 | -1.02976275  | 1.04E-16  | 2.91E-15    |
| ppa011828m PACid:17667327 | -1.029343962 | 4.83E-05  | 0.000431171 |
| ppa009193m PACid:17658815 | -1.028372498 | 1.85E-09  | 3.11E-08    |
| ppa022680m PACid:17666197 | -1.027055351 | 8.89E-06  | 9.16E-05    |
| ppa001534m PACid:17664605 | -1.026956477 | 1.78E-11  | 3.55E-10    |
| ppa012251m PACid:17651383 | -1.023482565 | 3.26E-36  | 1.83E-34    |
| ppa013088m PACid:17666531 | -1.013512697 | 9.32E-16  | 2.48E-14    |
| ppa012891m PACid:17656691 | -1.008377349 | 1.67E-07  | 2.24E-06    |
| ppa004884m PACid:17647851 | -1.006687575 | 6.29E-17  | 1.78E-15    |
| ppa013414m PACid:17643791 | -1.00414622  | 4.87E-11  | 9.35E-10    |
| ppa011067m PACid:17647317 | -1.003545863 | 2.50E-26  | 1.07E-24    |

---

**Supplementary Table S6** The correlation between the differentially expressed proteins and genes in the whole library. The X is the expression quantity of the differentially expressed proteins and the Y is the expression quantity of genes in the whole library.

| <sup>a</sup> Spot No | Protein      | Gene                      | X            | Y            |
|----------------------|--------------|---------------------------|--------------|--------------|
| 31                   | ppa005617    | ppa005617m PACid:17664214 | 1.831877241  | -1.68968165  |
| 21                   | ppa011448    | ppa011448m PACid:17646081 | -6.64385619  | 5.292282633  |
| 27                   | ppa007748    | ppa007748m PACid:17651918 | 2.939226578  | -0.335708945 |
| 2                    | ppa003391    | ppa003391m PACid:17655389 | 1.545968369  | 0.06529146   |
| 30                   | ppa010413    | ppa010413m PACid:17642780 | -2.13093087  | 0.623933732  |
| 18                   | ppa004554    | ppa004554m PACid:17664318 | 1.422233001  | -0.359081093 |
| 32                   | ppa007242    | ppa007242m PACid:17668944 | 1.859969548  | -0.762276683 |
| 1                    | gi 2460186   | ppa012651m PACid:17642469 | -1.765534746 | -6.882643049 |
| 11                   | ppa004430    | ppa004430m PACid:17665888 | -1.350497247 | 0.388301771  |
| 23                   | gi 374671153 | ppa010748m PACid:17648023 | 1.378511623  | 2.231099117  |
| 35                   | ppa006226    | ppa006226m PACid:17663253 | -1.411426246 | -0.155119067 |
| 6                    | ppa010479    | ppa010479m PACid:17642602 | 2.807354922  | 0.705700372  |
| 9                    | ppa007696    | ppa007696m PACid:17669094 | 1.604071324  | -0.421741167 |
| 19                   | ppa004726    | ppa004726m PACid:17655111 | -1.510961919 | 0.124847848  |
| 20                   | ppa011112    | ppa011112m PACid:17657156 | 1.765534746  | 0.801900492  |
| 33                   | gi 33772153  | ppa013109m PACid:17643063 | 1.339137385  | -1.090828978 |
| 28                   | gi 381283804 | ppa009729m PACid:17666637 | 1.438292852  | 0.638245233  |
| 8                    | ppa007154    | ppa007186m PACid:17659073 | 1.459431619  | -0.116917752 |
| 16                   | gi 4650846   | ppa007772m PACid:17658645 | 1.280956314  | -0.561145471 |

<sup>a</sup> Numbering corresponds to the 2-DE gel in Fig. 2.

**Supplementary Fig. S1** Morphology changes before and after the dormancy break in Japanese apricot. A represents the endodormancy of the flower bud, and B represents green tips, showing that the flower buds of Japanese apricot have broken their dormancy.

**Supplementary Fig. S2** Experimental design associated with dormancy release in Japanese apricot.

**Supplementary Fig. S3** Experimental process of digital gene expression profile.

**Supplementary Fig. S4** The images of the original gels and the matchsets appearing in Fig. 2.

**Supplementary Fig. S5** Histogram showing pathway enrichment analysis for differentially expressed genes in Japanese apricot after GA<sub>4</sub> treatment (10 days).

**Supplementary Fig. S6** Real-time qPCR validations of tag-mapped genes are shown in A, and B represents the scatter plots which indicated the cycle threshold (Ct) value of qRT-PCR analysis and the log<sub>2</sub> transcripts per million tags value of differentially expressed genes.

**Supplementary Fig. S7** Correlation between the differentially expressed proteins and genes in the whole library.

**Supplementary Fig. S8** The principal component analysis of the whole library genes (A), differentially expressed genes (B) and differentially expressed proteins (C). Each spot represents an expressed gene; the black spot represents an up-regulated gene, and the red spot represents down-regulated gene. In A, B and C, the cumulative contribution rate (including the contribution rate of the first principal component and the second principal component) was more than 0.999999, which showed the significance between the up-/down-regulated genes/proteins and the expressed genes/proteins.



Supplementary Fig. S1

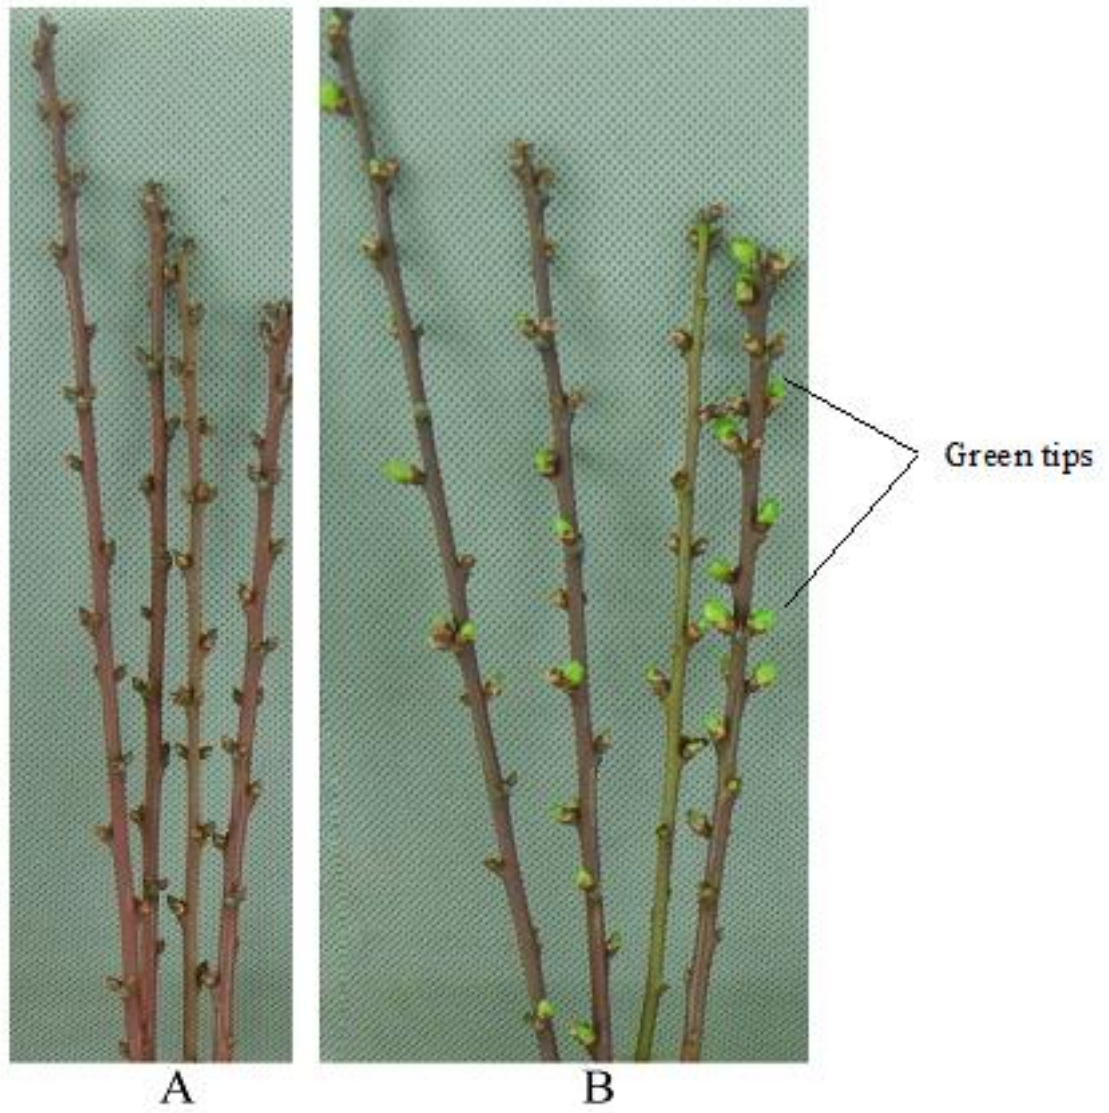

Supplementary Fig. S2

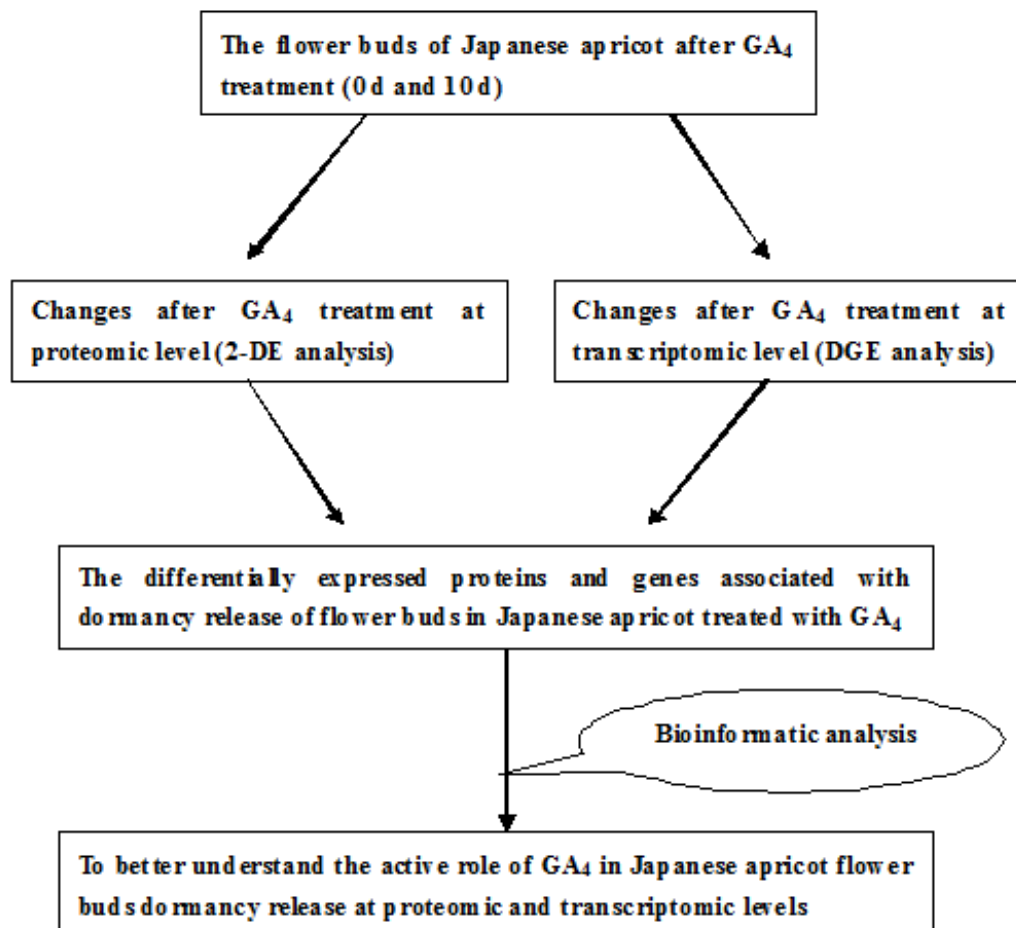

Supplementary Fig. S3

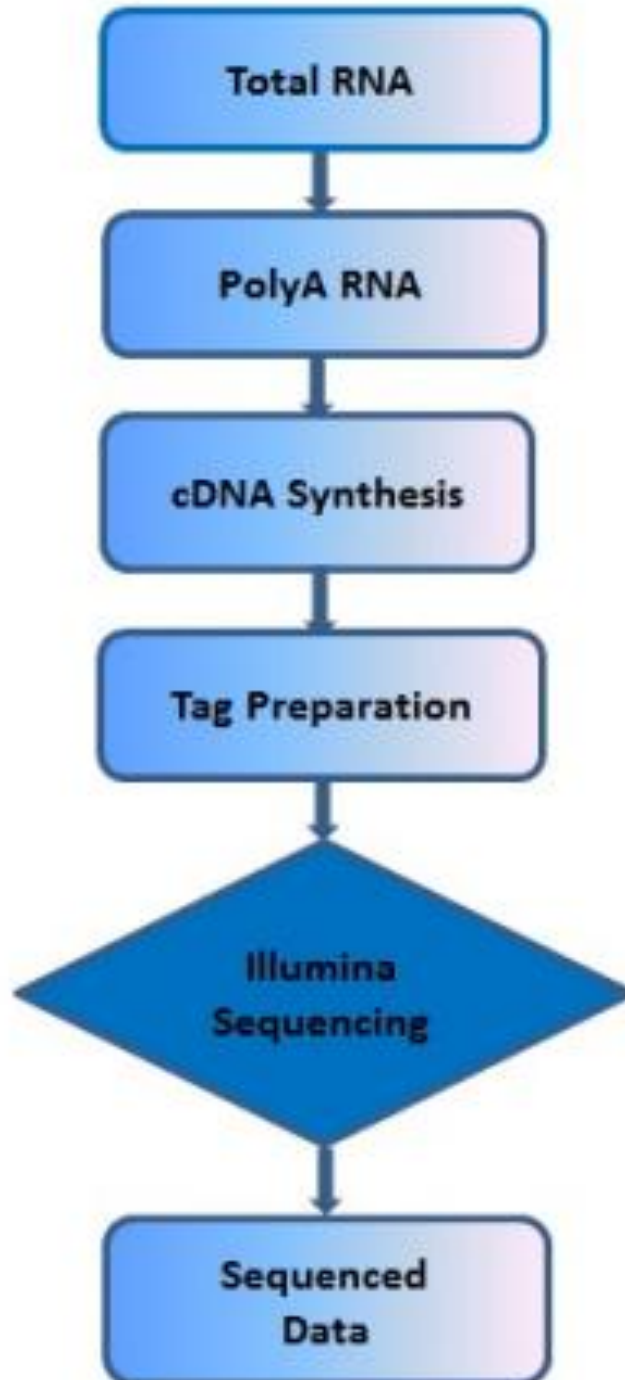

# Supplementary Fig. S4

Control

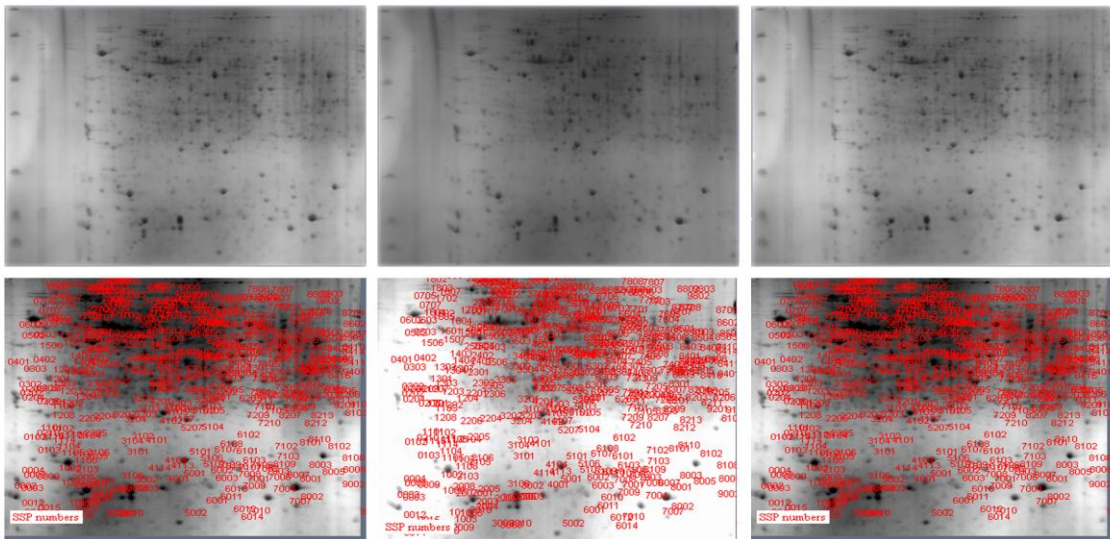

W10

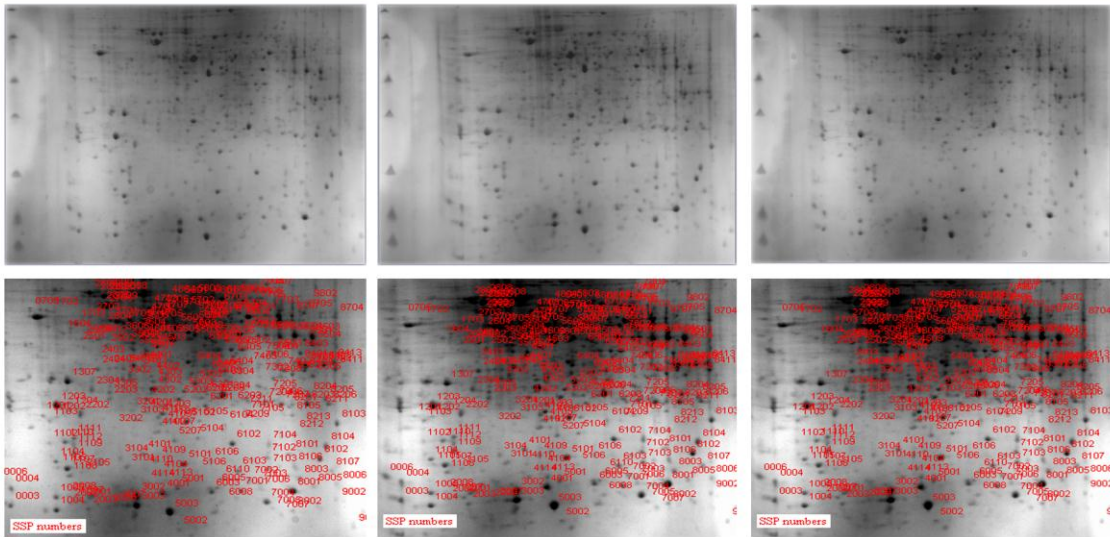

G10

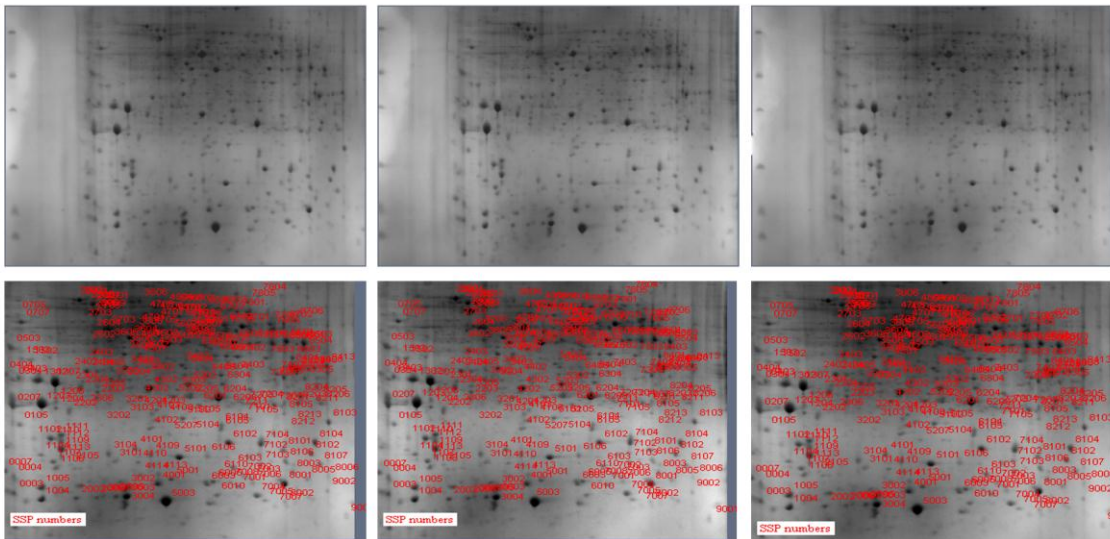

Supplementary Fig. S5

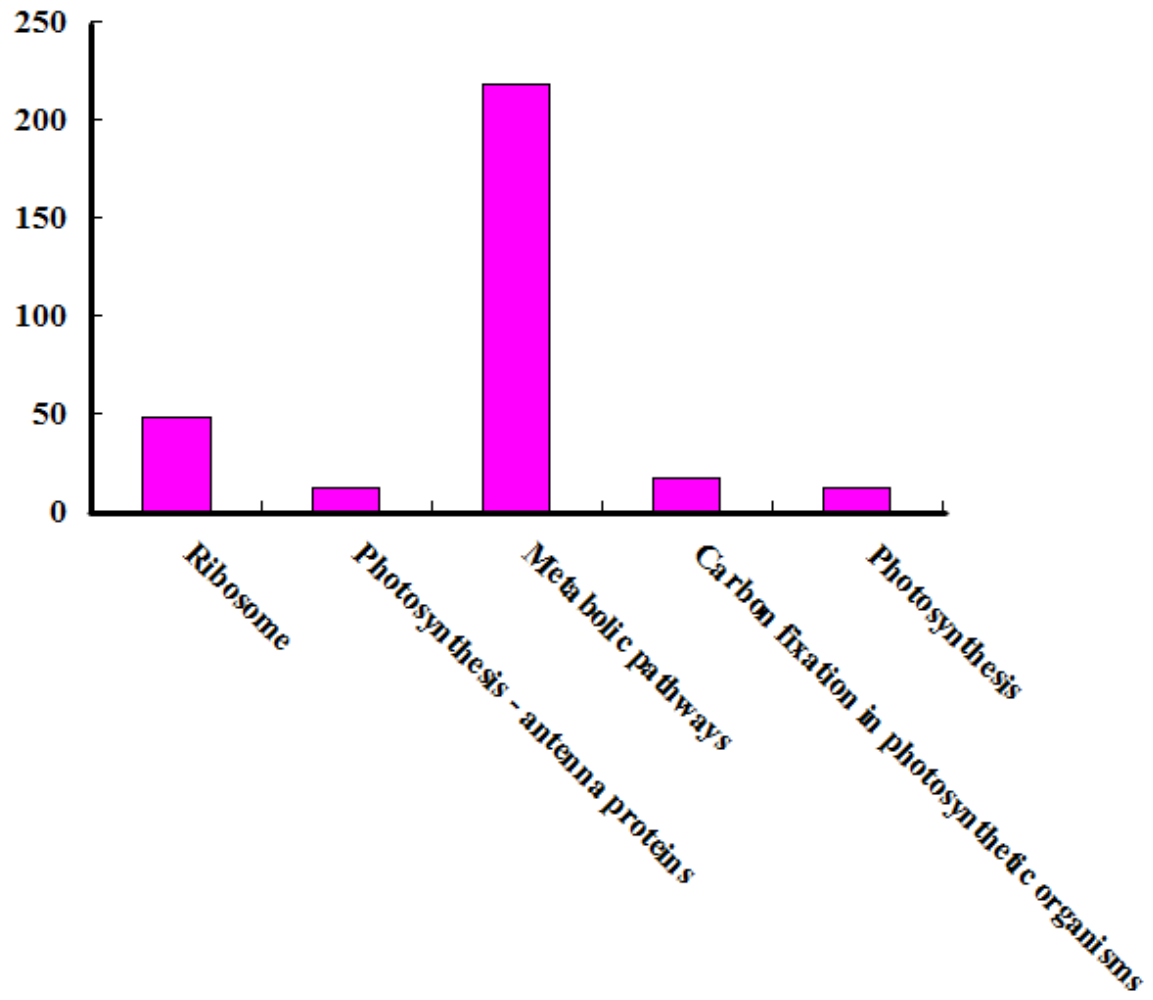



Supplementary Fig. S6

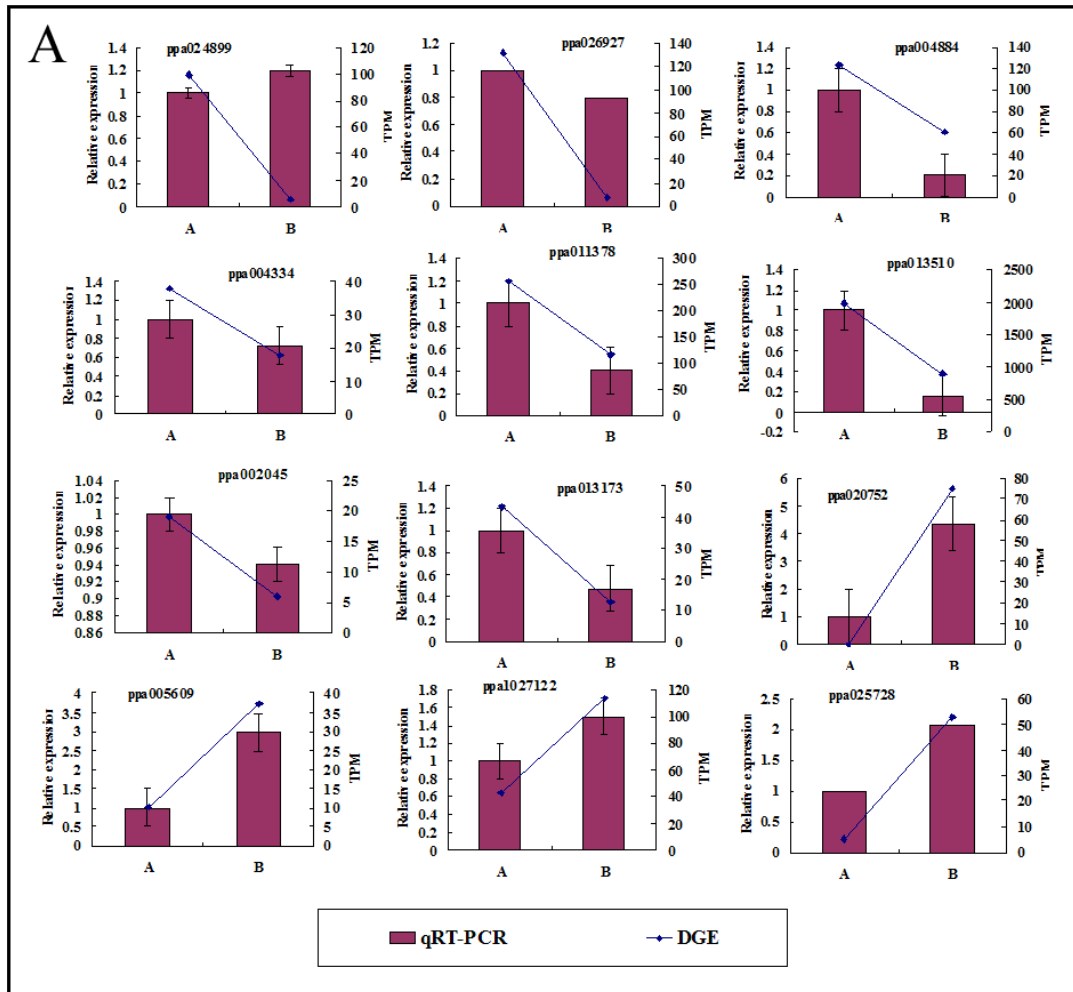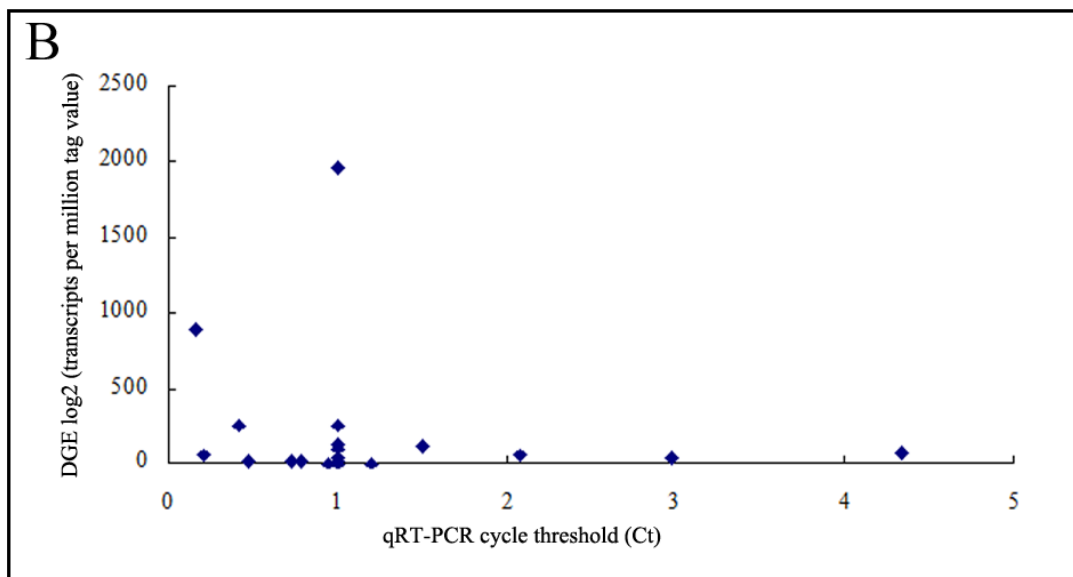

Supplementary Fig. S7

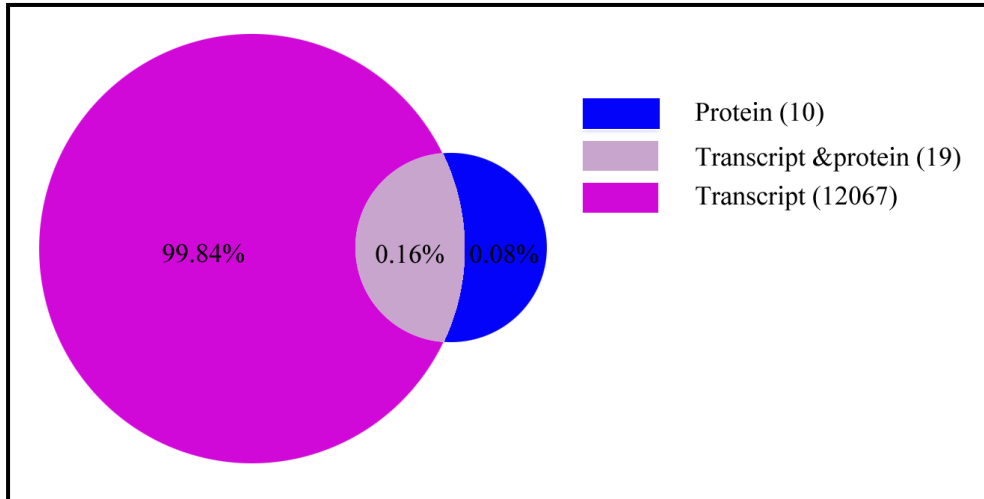

Supplementary Fig. S8

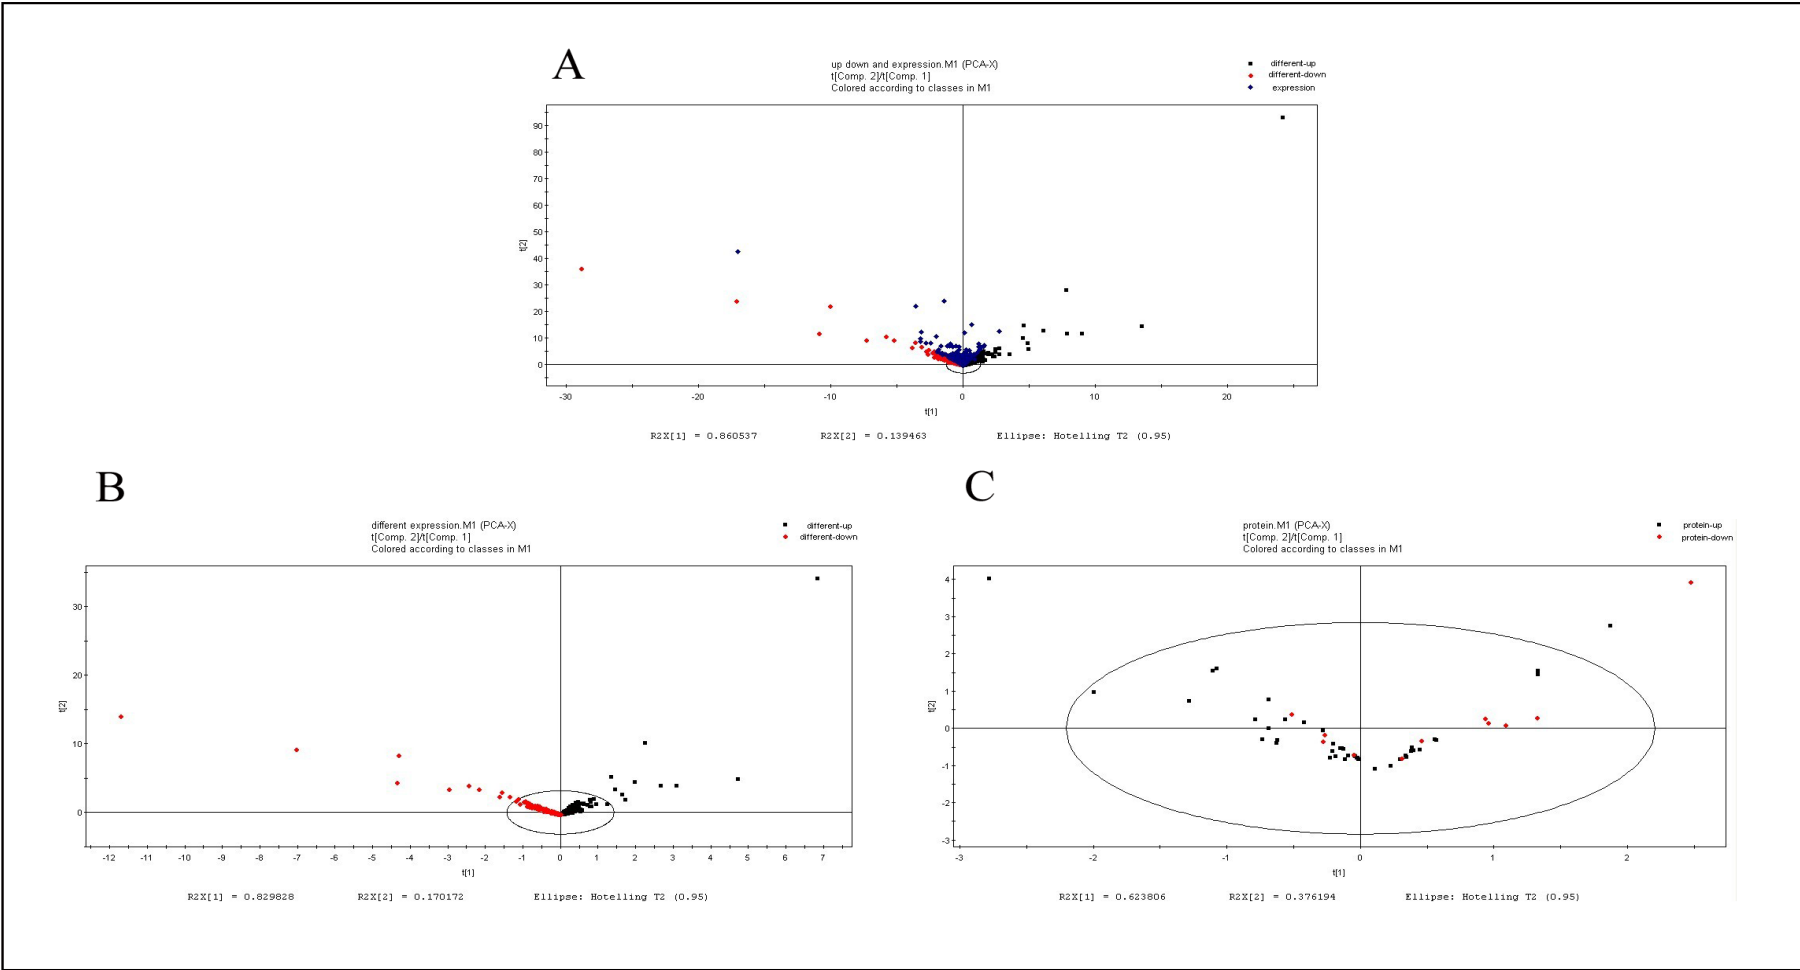

Supplement: supp_ert284_jexbot092262_file001.pdf [file supp_ert284_jexbot092262_file001.pdf]
